# Supplementary material for: Differential Allelic Expression in the Human Genome: A Robust Approach To Identify Genetic and Epigenetic Cis-Acting Mechanisms Regulating Gene Expression
Source: PubMed Central journal article supplement (PMC2265535; doi:10.1371/journal.pgen.1000006), 2008-02-29
Supplement: pgen.1000006.s015.pdf [file pgen.1000006.s015.pdf]

**Supplemental Table 2. All SNPs expressed in at least three heterozygous individuals**

| rs         | Gene     | Panel  | chr | # Hets | Variance & Mean | meanAI | A vs. B   |
|------------|----------|--------|-----|--------|-----------------|--------|-----------|
| rs135106   | A4GALT   | Encode | 22  | 10     |                 | NA     | NA        |
| rs17064    | ABCB1    | Encode | 7   | 7      |                 | NA     | NA        |
| rs17064    | ABCB1    | Cancer | 7   | 6      |                 | NA     | NA        |
| rs3842     | ABCB1    | Cancer | 7   | 14     | High variance   | NA     | NA        |
| rs2302387  | ABCB4    | Cancer | 7   | 14     |                 | NA     | NA        |
| rs562      | ABCC5    | Cancer | 3   | 28     |                 | 55:45  | 0 vs. 22  |
| rs183436   | ABCG1    | Encode | 21  | 36     |                 | 75:25  | 0 vs. 34  |
| rs1056209  | ABL1     | Cancer | 9   | 15     |                 | NA     | NA        |
| rs7457     | ABL1     | Cancer | 9   | 18     |                 | NA     | NA        |
| rs2274230  | ABL2     | Cancer | 1   | 9      | High variance   | 70:30  | 1 vs. 6   |
| rs1046048  | ACVR2B   | Cancer | 3   | 36     |                 | 50:50  | 1 vs. 12  |
| rs2838820  | ADARB1   | Encode | 21  | 22     |                 | 55:45  | 2 vs. 11  |
| rs1342387  | ADIPOR1  | Encode | 1   | 27     |                 | 50:50  | 2 vs. 1   |
| rs7539542  | ADIPOR1  | Encode | 1   | 34     |                 | 55:45  | 0 vs. 26  |
| rs2525485  | AFF4     | Encode | 5   | 40     |                 | 50:50  | 3 vs. 13  |
| rs42395    | AFF4     | Encode | 5   | 40     |                 | 50:50  | 0 vs. 13  |
| rs739863   | AFF4     | Encode | 5   | 25     |                 | 55:45  | 25 vs. 0  |
| rs13847    | AGPAT3   | Encode | 21  | 27     |                 | 50:50  | 1 vs. 9   |
| rs2066853  | AHR      | Cancer | 7   | 7      |                 | 55:45  | 5 vs. 0   |
| rs4978877  | AKAP2    | Cancer | 9   | 9      |                 | 50:50  | 2 vs. 0   |
| rs2498799  | AKT1     | Cancer | 14  | 34     |                 | 55:45  | 0 vs. 26  |
| rs1321     | ALG12    | Encode | 22  | 32     |                 | NA     | NA        |
| rs7286796  | AP1B1    | Encode | 22  | 39     |                 | 50:50  | 2 vs. 0   |
| rs397768   | APC      | Cancer | 5   | 49     |                 | 50:50  | 4 vs. 17  |
| rs448475   | APC      | Cancer | 5   | 55     |                 | 50:50  | 4 vs. 31  |
| rs866006   | APC      | Cancer | 5   | 53     |                 | 50:50  | 1 vs. 10  |
| rs2281106  | APOBEC3C | Encode | 22  | 29     |                 | 55:45  | 0 vs. 10  |
| rs2076101  | APOBEC3F | Encode | 22  | 33     |                 | 50:50  | 11 vs. 0  |
| rs5750735  | APOBEC3F | Encode | 22  | 34     |                 | 50:50  | 5 vs. 6   |
| rs12160242 | APOBEC3G | Encode | 22  | 10     |                 | NA     | NA        |
| rs5757465  | APOBEC3G | Encode | 22  | 39     |                 | 55:45  | 0 vs. 38  |
| rs1807740  | APOL1    | Encode | 22  | 15     |                 | 50:50  | 1 vs. 4   |
| rs2239785  | APOL1    | Encode | 22  | 25     |                 | 55:45  | 7 vs. 10  |
| rs9610467  | APOL1    | Encode | 22  | 13     |                 | NA     | NA        |
| rs9610460  | APOL2    | Encode | 22  | 46     |                 | 55:45  | 26 vs. 6  |
| rs132618   | APOL3    | Encode | 22  | 33     |                 | 50:50  | 0 vs. 13  |
| rs132621   | APOL3    | Encode | 22  | 27     |                 | 50:50  | 2 vs. 9   |
| rs4393836  | ARFGAP3  | Encode | 22  | 8      |                 | 50:50  | 4 vs. 0   |
| rs738535   | ARFGAP3  | Encode | 22  | 44     |                 | 50:50  | 3 vs. 1   |
| rs244468   | ARHGAP26 | Encode | 5   | 36     |                 | 50:50  | 6 vs. 4   |
| rs4703     | ARHGDIB  | Cancer | 12  | 40     |                 | 50:50  | 0 vs. 23  |
| rs921      | ARHGDIB  | Cancer | 12  | 12     |                 | NA     | NA        |
| rs1051861  | ARID4A   | Cancer | 14  | 36     |                 | 55:45  | 0 vs. 26  |
| rs11552229 | ARNT     | Cancer | 1   | 36     |                 | 50:50  | 8 vs. 0   |
| rs2228099  | ARNT     | Cancer | 1   | 37     |                 | 50:50  | 0 vs. 2   |
| rs139297   | ARP10    | Encode | 22  | 34     |                 | 50:50  | 2 vs. 11  |
| rs139316   | ARP10    | Encode | 22  | 35     |                 | 55:45  | 29 vs. 0  |
| rs6151429  | ARSA     | Encode | 22  | 24     |                 | 85:15  | 24 vs. 0  |
| rs743616   | ARSA     | Encode | 22  | 37     |                 | 60:40  | 18 vs. 12 |

| rs         | Gene     | Panel  | chr | # Hets | Variance & Mean | meanAI | A vs. B   |
|------------|----------|--------|-----|--------|-----------------|--------|-----------|
| rs36571    | ASCC2    | Encode | 22  | 6      |                 | NA     | NA        |
| rs9782     | ASCL1    | Cancer | 12  | 28     |                 | 60:40  | 3 vs. 11  |
| rs1800889  | ATM      | Cancer | 11  | 4      |                 | 50:50  | 0 vs. 3   |
| rs609261   | ATM      | Cancer | 11  | 41     |                 | 55:45  | 1 vs. 29  |
| rs1320525  | ATP11A   | Encode | 13  | 30     |                 | 50:50  | 11 vs. 2  |
| rs423117   | ATP11A   | Encode | 13  | 15     |                 | 55:45  | 1 vs. 6   |
| rs17728665 | ATP5O    | Encode | 21  | 14     |                 | 50:50  | 0 vs. 13  |
| rs3532     | ATP6V1E1 | Encode | 22  | 29     |                 | 60:40  | 29 vs. 0  |
| rs5992084  | ATP6V1E1 | Encode | 22  | 33     |                 | 55:45  | 0 vs. 32  |
| rs2227928  | ATR      | Cancer | 3   | 35     |                 | 55:45  | 2 vs. 17  |
| rs134860   | ATXN10   | Encode | 22  | 16     |                 | 50:50  | 1 vs. 1   |
| rs9614791  | ATXN10   | Encode | 22  | 6      |                 | 50:50  | 2 vs. 1   |
| rs1053338  | ATXN7    | Cancer | 3   | 36     |                 | 50:50  | 1 vs. 11  |
| rs3774729  | ATXN7    | Cancer | 3   | 39     |                 | 50:50  | 1 vs. 19  |
| rs393521   | AXIN1    | Encode | 16  | 24     |                 | 55:45  | 0 vs. 22  |
| rs393521   | AXIN1    | Cancer | 16  | 21     |                 | 55:45  | 0 vs. 20  |
| rs758033   | AXIN1    | Encode | 16  | 23     |                 | 50:50  | 0 vs. 12  |
| rs1046210  | BACE2    | Encode | 21  | 42     |                 | 50:50  | 7 vs. 7   |
| rs12149    | BACE2    | Encode | 21  | 30     |                 | 55:45  | 8 vs. 5   |
| rs388707   | BACH1    | Encode | 21  | 34     |                 | 50:50  | 1 vs. 10  |
| rs1043782  | BAG4     | Cancer | 8   | 32     |                 | 55:45  | 31 vs. 0  |
| rs210135   | BAK1     | Cancer | 6   | 21     |                 | 60:40  | 0 vs. 21  |
| rs1048108  | BARD1    | Cancer | 2   | 33     |                 | 55:45  | 0 vs. 18  |
| rs2070096  | BARD1    | Cancer | 2   | 21     |                 | 50:50  | 2 vs. 18  |
| rs2229571  | BARD1    | Cancer | 2   | 44     |                 | 50:50  | 5 vs. 4   |
| rs4645900  | BAX      | Cancer | 19  | 6      |                 | NA     | NA        |
| rs704243   | BAX      | Cancer | 19  | 15     |                 | NA     | NA        |
| rs128941   | BC002942 | Encode | 22  | 34     |                 | 55:45  | 0 vs. 11  |
| rs1564483  | BCL2     | Cancer | 18  | 34     |                 | 50:50  | 0 vs. 11  |
| rs4987852  | BCL2     | Cancer | 18  | 5      |                 | 55:45  | 0 vs. 5   |
| rs3826007  | BCL2A1   | Cancer | 15  | 28     |                 | 50:50  | 22 vs. 0  |
| rs4488761  | BCL2L13  | Encode | 22  | 43     |                 | 50:50  | 1 vs. 8   |
| rs180817   | BCR      | Cancer | 22  | 15     |                 | 60:40  | 6 vs. 2   |
| rs11090143 | BIK      | Encode | 22  | 7      | High variance   | NA     | NA        |
| rs1474593  | BIRC4    | Encode | X   | 19     | High variance   | 90:10  | 11 vs. 8  |
| rs17330644 | BIRC4    | Encode | X   | 15     | High variance   | 80:20  | 10 vs. 4  |
| rs5956583  | BIRC4    | Cancer | X   | 21     | High variance   | 90:10  | 13 vs. 8  |
| rs5958343  | BIRC4    | Cancer | X   | 26     | High variance   | 85:15  | 14 vs. 11 |
| rs8371     | BIRC4    | Cancer | X   | 20     | High variance   | 85:15  | 15 vs. 5  |
| rs9856     | BIRC4    | Cancer | X   | 24     | High variance   | 85:15  | 15 vs. 8  |
| rs1042489  | BIRC5    | Cancer | 17  | 52     |                 | 50:50  | 10 vs. 0  |
| rs2250788  | BLK      | Cancer | 8   | 16     |                 | NA     | NA        |
| rs1063147  | BLM      | Cancer | 15  | 35     |                 | 50:50  | 2 vs. 18  |
| rs17273563 | BLM      | Cancer | 15  | 35     |                 | 50:50  | 2 vs. 10  |
| rs17274095 | BLM      | Cancer | 15  | 35     |                 | 55:45  | 0 vs. 21  |
| rs235768   | BMP2     | Cancer | 20  | 7      | High variance   | 60:40  | 3 vs. 3   |
| rs1044104  | BMP6     | Cancer | 6   | 22     |                 | 60:40  | 6 vs. 9   |
| rs11528010 | BMPR1A   | Cancer | 10  | 33     |                 | 55:45  | 32 vs. 0  |
| rs7078571  | BMPR1A   | Cancer | 10  | 6      |                 | NA     | NA        |
| rs1048829  | BMPR2    | Cancer | 2   | 39     |                 | 50:50  | 4 vs. 4   |
| rs1061157  | BMPR2    | Cancer | 2   | 15     |                 | 50:50  | 4 vs. 1   |

| rs         | Gene      | Panel  | chr | # Hets | Variance & Mean | meanAI | A vs. B   |
|------------|-----------|--------|-----|--------|-----------------|--------|-----------|
| rs3731696  | BMP2      | Cancer | 2   | 15     |                 | 50:50  | 0 vs. 2   |
| rs16940    | BRCA1     | Cancer | 17  | 23     |                 | 50:50  | 0 vs. 10  |
| rs1799966  | BRCA1     | Cancer | 17  | 24     |                 | 50:50  | 2 vs. 6   |
| rs799917   | BRCA1     | Cancer | 17  | 25     |                 | 50:50  | 0 vs. 11  |
| rs144848   | BRCA2     | Cancer | 13  | 43     |                 | 50:50  | 0 vs. 2   |
| rs15869    | BRCA2     | Cancer | 13  | 28     |                 | 50:50  | 4 vs. 7   |
| rs1801406  | BRCA2     | Cancer | 13  | 32     |                 | 50:50  | 13 vs. 11 |
| rs543304   | BRCA2     | Cancer | 13  | 31     |                 | 50:50  | 5 vs. 0   |
| rs1041439  | BRWD1     | Encode | 21  | 10     |                 | NA     | NA        |
| rs13625    | BRWD1     | Encode | 21  | 36     |                 | 50:50  | 1 vs. 2   |
| rs2056844  | BRWD1     | Encode | 21  | 40     |                 | 50:50  | 0 vs. 24  |
| rs2297255  | BRWD1     | Encode | 21  | 13     |                 | NA     | NA        |
| rs8259     | BSG       | Cancer | 19  | 34     |                 | 55:45  | 0 vs. 23  |
| rs1057403  | BTK       | Cancer | X   | 4      |                 | 85:15  | 3 vs. 1   |
| rs700      | BTK       | Cancer | X   | 22     | High variance   | 85:15  | 11 vs. 10 |
| rs6971     | BZRP      | Encode | 22  | 30     |                 | 55:45  | 7 vs. 15  |
| rs12886549 | C14orf154 | Encode | 14  | 31     |                 | 55:45  | 0 vs. 26  |
| rs1045001  | C16orf33  | Encode | 16  | 21     |                 | 50:50  | 1 vs. 12  |
| rs229519   | C1QTNF6   | Encode | 22  | 35     |                 | 55:45  | 1 vs. 18  |
| rs7290488  | C1QTNF6   | Encode | 22  | 21     |                 | NA     | NA        |
| rs4911494  | C20orf44  | Encode | 20  | 37     |                 | 50:50  | 2 vs. 4   |
| rs2837029  | C21orf13  | Encode | 21  | 15     | Mean shifted    | 70:30  | 0 vs. 11  |
| rs2835246  | C21orf18  | Encode | 21  | 11     |                 | NA     | NA        |
| rs8738     | C21orf18  | Encode | 21  | 11     |                 | NA     | NA        |
| rs13050556 | C21orf25  | Encode | 21  | 43     |                 | 50:50  | 5 vs. 11  |
| rs3168     | C21orf25  | Encode | 21  | 17     |                 | 50:50  | 2 vs. 0   |
| rs3746906  | C21orf25  | Encode | 21  | 45     |                 | 50:50  | 0 vs. 22  |
| rs2838491  | C21orf33  | Encode | 21  | 21     |                 | 55:45  | 1 vs. 8   |
| rs11702555 | C21orf5   | Encode | 21  | 32     |                 | 50:50  | 18 vs. 11 |
| rs3827183  | C21orf5   | Encode | 21  | 14     |                 | 50:50  | 1 vs. 3   |
| rs9749     | C21orf51  | Encode | 21  | 44     |                 | 50:50  | 9 vs. 1   |
| rs7283236  | C21orf69  | Encode | 21  | 37     |                 | 55:45  | 17 vs. 4  |
| rs2832236  | C21orf7   | Encode | 21  | 40     | High variance   | 65:35  | 11 vs. 15 |
| rs9978281  | C21orf7   | Encode | 21  | 12     | High variance   | NA     | NA        |
| rs1047978  | C21orf91  | Encode | 21  | 33     |                 | 55:45  | 0 vs. 28  |
| rs2258119  | C21orf91  | Encode | 21  | 25     |                 | 60:40  | 25 vs. 0  |
| rs9704     | C22orf13  | Encode | 22  | 22     |                 | 55:45  | 0 vs. 21  |
| rs5758511  | C22orf18  | Encode | 22  | 34     |                 | 60:40  | 0 vs. 33  |
| rs6002555  | C22orf18  | Encode | 22  | 27     |                 | 50:50  | 4 vs. 4   |
| rs1049534  | C22orf19  | Encode | 22  | 26     |                 | 50:50  | 0 vs. 4   |
| rs737976   | C22orf19  | Encode | 22  | 44     |                 | 50:50  | 0 vs. 27  |
| rs6007594  | C22orf8   | Encode | 22  | 28     |                 | 70:30  | 0 vs. 22  |
| rs1043731  | C22orf9   | Encode | 22  | 26     |                 | 50:50  | 0 vs. 14  |
| rs2545166  | C5orf18   | Cancer | 5   | 52     |                 | 50:50  | 2 vs. 35  |
| rs3317     | C5orf18   | Cancer | 5   | 55     |                 | 50:50  | 12 vs. 12 |
| rs311677   | C6orf150  | Encode | 6   | 5      |                 | NA     | NA        |
| rs610913   | C6orf150  | Encode | 6   | 30     |                 | 50:50  | 9 vs. 0   |
| rs9352000  | C6orf150  | Encode | 6   | 15     |                 | NA     | NA        |
| rs5760180  | CABIN1    | Encode | 22  | 21     |                 | 50:50  | 1 vs. 5   |
| rs2271627  | CAPG      | Cancer | 2   | 32     |                 | 55:45  | 16 vs. 3  |
| rs2975767  | CAPN10    | Cancer | 2   | 11     |                 | 50:50  | 4 vs. 2   |

| rs         | Gene     | Panel  | chr | # Hets | Variance & Mean | meanAI | A vs. B  |
|------------|----------|--------|-----|--------|-----------------|--------|----------|
| rs3173936  | CAPZA2   | Encode | 7   | 21     |                 | NA     | NA       |
| rs3807999  | CAPZA2   | Encode | 7   | 20     |                 | NA     | NA       |
| rs3135500  | CARD15   | Cancer | 16  | 40     |                 | 50:50  | 1 vs. 3  |
| rs13006529 | CASP10   | Cancer | 2   | 33     |                 | 60:40  | 0 vs. 25 |
| rs3900115  | CASP10   | Cancer | 2   | 38     |                 | 50:50  | 1 vs. 10 |
| rs1049216  | CASP3    | Cancer | 4   | 31     |                 | 50:50  | 0 vs. 19 |
| rs1042891  | CASP6    | Cancer | 4   | 41     |                 | 60:40  | 0 vs. 41 |
| rs12443102 | CATSPER2 | Encode | 15  | 8      |                 | NA     | NA       |
| rs8042868  | CATSPER2 | Encode | 15  | 8      |                 | NA     | NA       |
| rs6867     | CAV1     | Cancer | 7   | 11     |                 | NA     | NA       |
| rs8713     | CAV1     | Cancer | 7   | 15     |                 | 55:45  | 10 vs. 0 |
| rs1047417  | CBL      | Cancer | 11  | 31     |                 | 50:50  | 2 vs. 4  |
| rs1042852  | CBLB     | Encode | 3   | 38     |                 | 55:45  | 0 vs. 36 |
| rs2305035  | CBLB     | Cancer | 3   | 40     |                 | 50:50  | 8 vs. 0  |
| rs2305035  | CBLB     | Encode | 3   | 33     |                 | 50:50  | 0 vs. 1  |
| rs7649466  | CBLB     | Encode | 3   | 30     |                 | 50:50  | 9 vs. 3  |
| rs1005696  | CBR1     | Encode | 21  | 40     |                 | 55:45  | 6 vs. 13 |
| rs20572    | CBR1     | Encode | 21  | 11     |                 | NA     | NA       |
| rs706209   | CBS      | Encode | 21  | 42     |                 | 55:45  | 2 vs. 27 |
| rs2235140  | CBX6     | Encode | 22  | 31     |                 | 55:45  | 22 vs. 0 |
| rs3817655  | CCL5     | Encode | 17  | 16     |                 | 55:45  | 4 vs. 9  |
| rs769242   | CCNA2    | Cancer | 4   | 16     |                 | NA     | NA       |
| rs1049612  | CCND2    | Cancer | 12  | 41     |                 | 50:50  | 2 vs. 17 |
| rs3217926  | CCND2    | Cancer | 12  | 41     |                 | 50:50  | 0 vs. 16 |
| rs3217933  | CCND2    | Cancer | 12  | 36     |                 | 50:50  | 0 vs. 18 |
| rs9529     | CCND3    | Cancer | 6   | 44     |                 | 50:50  | 7 vs. 8  |
| rs1406     | CCNE1    | Cancer | 19  | 34     |                 | 55:45  | 0 vs. 32 |
| rs4150052  | CCNG2    | Cancer | 4   | 15     |                 | NA     | NA       |
| rs8193     | CD44     | Cancer | 11  | 43     |                 | 50:50  | 24 vs. 7 |
| rs9666607  | CD44     | Cancer | 11  | 28     |                 | 50:50  | 0 vs. 12 |
| rs7357     | CD59     | Cancer | 11  | 33     |                 | 50:50  | 12 vs. 4 |
| rs842      | CD59     | Cancer | 11  | 33     |                 | 50:50  | 2 vs. 13 |
| rs1129055  | CD86     | Cancer | 3   | 39     |                 | NA     | NA       |
| rs2681417  | CD86     | Cancer | 3   | 5      |                 | NA     | NA       |
| rs1871446  | CDC2     | Cancer | 10  | 29     |                 | 50:50  | 6 vs. 1  |
| rs8156     | CDC25B   | Cancer | 20  | 25     |                 | NA     | NA       |
| rs2302341  | CDC2L5   | Cancer | 7   | 7      |                 | NA     | NA       |
| rs3735135  | CDC2L5   | Cancer | 7   | 7      |                 | NA     | NA       |
| rs1801552  | CDH1     | Encode | 16  | 20     |                 | 55:45  | 0 vs. 6  |
| rs1041985  | CDH2     | Encode | 18  | 38     |                 | 70:30  | 3 vs. 20 |
| rs1946482  | CDK10    | Cancer | 16  | 24     |                 | 55:45  | 0 vs. 15 |
| rs2069398  | CDK2     | Cancer | 12  | 11     |                 | NA     | NA       |
| rs42039    | CDK6     | Cancer | 7   | 35     |                 | 50:50  | 2 vs. 14 |
| rs8083     | CDK9     | Cancer | 9   | 33     |                 | 50:50  | 1 vs. 20 |
| rs7330     | CDKN1B   | Cancer | 12  | 41     |                 | NA     | NA       |
| rs11515    | CDKN2A   | Cancer | 9   | 17     |                 | 55:45  | 12 vs. 2 |
| rs3088440  | CDKN2A   | Cancer | 9   | 31     |                 | 60:40  | 1 vs. 17 |
| rs12855    | CDKN2C   | Cancer | 1   | 20     |                 | 55:45  | 0 vs. 20 |
| rs2231495  | CECR1    | Encode | 22  | 22     |                 | 50:50  | 8 vs. 1  |
| rs1034859  | CECR5    | Encode | 22  | 37     |                 | 50:50  | 6 vs. 13 |
| rs971768   | CECR6    | Encode | 22  | 17     |                 | NA     | NA       |

| rs         | Gene      | Panel  | chr | # Hets | Variance & Mean | meanAI | A vs. B   |
|------------|-----------|--------|-----|--------|-----------------|--------|-----------|
| rs6007897  | CELSR1    | Encode | 22  | 10     | High variance   | 70:30  | 4 vs. 4   |
| rs2274238  | CEP250    | Encode | 20  | 7      |                 | 50:50  | 0 vs. 2   |
| rs3748433  | CEP250    | Encode | 20  | 7      |                 | NA     | NA        |
| rs3818441  | CEP250    | Encode | 20  | 18     |                 | NA     | NA        |
| rs2748348  | CERK      | Encode | 22  | 42     |                 | 50:50  | 2 vs. 10  |
| rs8596     | CHAF1B    | Encode | 21  | 14     |                 | NA     | NA        |
| rs2272457  | CHD2      | Cancer | 15  | 38     |                 | 50:50  | 2 vs. 6   |
| rs4777755  | CHD2      | Cancer | 15  | 15     |                 | 50:50  | 3 vs. 2   |
| rs506504   | CHEK1     | Cancer | 11  | 5      |                 | NA     | NA        |
| rs3741490  | CHFR      | Cancer | 12  | 36     |                 | 60:40  | 1 vs. 30  |
| rs1056825  | CHI3L2    | Cancer | 1   | 38     | High variance   | 75:25  | 28 vs. 2  |
| rs1056831  | CHI3L2    | Cancer | 1   | 39     |                 | 90:10  | 37 vs. 2  |
| rs8535     | CHI3L2    | Cancer | 1   | 38     | High variance   | 75:25  | 29 vs. 4  |
| rs877292   | CHKB      | Encode | 22  | 26     |                 | NA     | NA        |
| rs1043833  | CHPF      | Encode | 2   | 39     |                 | 50:50  | 1 vs. 11  |
| rs1139564  | CIITA     | Encode | 16  | 18     |                 | 50:50  | 6 vs. 2   |
| rs4774     | CIITA     | Encode | 16  | 29     |                 | 50:50  | 0 vs. 7   |
| rs17862175 | CLDN12    | Encode | 7   | 6      |                 | NA     | NA        |
| rs917660   | CLDN12    | Encode | 7   | 15     | Mean shifted    | NA     | NA        |
| rs2834601  | CLIC6     | Encode | 21  | 8      | High variance   | NA     | NA        |
| rs6517254  | CLIC6     | Encode | 21  | 24     |                 | 55:45  | 2 vs. 10  |
| rs7224     | CLK1      | Cancer | 2   | 6      |                 | NA     | NA        |
| rs1061237  | COL1A1    | Cancer | 17  | 37     |                 | 50:50  | 3 vs. 1   |
| rs17334859 | CPNE1     | Cancer | 20  | 12     |                 | 60:40  | 2 vs. 9   |
| rs1043242  | CRKL      | Cancer | 22  | 32     |                 | 50:50  | 0 vs. 1   |
| rs1548410  | CRKL      | Cancer | 22  | 41     |                 | 50:50  | 20 vs. 8  |
| rs2266951  | CRKL      | Encode | 22  | 33     |                 | 55:45  | 25 vs. 2  |
| rs2285547  | CRKL      | Cancer | 22  | 41     |                 | 50:50  | 9 vs. 20  |
| rs737894   | CRKL      | Encode | 22  | 33     |                 | 55:45  | 33 vs. 0  |
| rs2229730  | CSK       | Cancer | 15  | 4      |                 | 60:40  | 0 vs. 4   |
| rs805256   | CSNK2B    | Cancer | 6   | 36     |                 | 50:50  | 0 vs. 24  |
| rs160279   | CSPG2     | Cancer | 5   | 51     |                 | 55:45  | 11 vs. 11 |
| rs1045480  | CTBP1     | Cancer | 4   | 24     |                 | NA     | NA        |
| rs6499137  | CTCF      | Cancer | 16  | 11     |                 | NA     | NA        |
| rs1059110  | CTNNA1    | Cancer | 5   | 37     |                 | 50:50  | 13 vs. 2  |
| rs2953     | CTNNB1    | Cancer | 3   | 43     |                 | 50:50  | 6 vs. 4   |
| rs17571    | CTSD      | Encode | 11  | 12     |                 | 55:45  | 0 vs. 8   |
| rs8839     | CTSD      | Cancer | 11  | 24     |                 | 50:50  | 2 vs. 8   |
| rs13345    | CTSH      | Cancer | 15  | 13     |                 | 65:35  | 0 vs. 12  |
| rs3129     | CTSH      | Cancer | 15  | 26     |                 | 55:45  | 1 vs. 17  |
| rs1131510  | CUL2      | Cancer | 10  | 25     |                 | 50:50  | 7 vs. 1   |
| rs1804430  | CXCL12    | Encode | 10  | 6      |                 | NA     | NA        |
| rs266088   | CXCL12    | Encode | 10  | 6      |                 | NA     | NA        |
| rs10336    | CXCL9     | Cancer | 4   | 11     | High variance   | 70:30  | 7 vs. 3   |
| rs6571303  | CXorf12   | Encode | X   | 8      |                 | 75:25  | 4 vs. 3   |
| rs2066852  | CYLD      | Cancer | 16  | 16     |                 | 50:50  | 1 vs. 0   |
| rs10916    | CYP1B1    | Cancer | 2   | 13     | High variance   | 60:40  | 6 vs. 3   |
| rs162549   | CYP1B1    | Cancer | 2   | 22     | High variance   | 65:35  | 18 vs. 2  |
| rs2855658  | CYP1B1    | Cancer | 2   | 37     | High variance   | 55:45  | 19 vs. 5  |
| rs2070540  | D21S2056E | Encode | 21  | 7      |                 | NA     | NA        |
| rs2276246  | D21S2056E | Encode | 21  | 9      |                 | NA     | NA        |

| rs         | Gene           | Panel  | chr | # Hets | Variance & Mean | meanAI | A vs. B  |
|------------|----------------|--------|-----|--------|-----------------|--------|----------|
| rs1051101  | DAD1           | Cancer | 14  | 37     |                 | 50:50  | 0 vs. 17 |
| rs1803479  | DAD1           | Cancer | 14  | 9      |                 | NA     | NA       |
| rs4981429  | DAD1           | Cancer | 14  | 40     |                 | 55:45  | 39 vs. 0 |
| rs1058207  | DAP3           | Cancer | 1   | 28     |                 | 50:50  | 2 vs. 11 |
| rs4933     | DAP3           | Cancer | 1   | 17     |                 | 60:40  | 0 vs. 17 |
| rs3118863  | DAPK1          | Cancer | 9   | 43     |                 | 55:45  | 11 vs. 4 |
| rs697221   | DDIT3          | Cancer | 12  | 28     |                 | 50:50  | 0 vs. 12 |
| rs1049633  | DDR1           | Cancer | 6   | 16     |                 | NA     | NA       |
| rs8408     | DDR1           | Cancer | 6   | 23     |                 | 55:45  | 8 vs. 6  |
| rs5750609  | DDX17          | Cancer | 22  | 27     |                 | 50:50  | 9 vs. 4  |
| rs763121   | DDX17          | Cancer | 22  | 33     |                 | 50:50  | 10 vs. 1 |
| rs763121   | DDX17          | Encode | 22  | 27     |                 | 50:50  | 0 vs. 0  |
| rs86796    | DDX17          | Cancer | 22  | 31     |                 | 50:50  | 24 vs. 0 |
| rs1052639  | DDX18          | Encode | 2   | 10     |                 | NA     | NA       |
| rs17756426 | DDX43          | Encode | 6   | 6      | High variance   | NA     | NA       |
| rs311683   | DDX43          | Encode | 6   | 15     | High variance   | 90:10  | 10 vs. 5 |
| rs311686   | DDX43          | Encode | 6   | 17     | High variance   | 85:15  | 5 vs. 12 |
| rs487728   | DDX6           | Cancer | 11  | 31     |                 | 55:45  | 29 vs. 0 |
| rs488219   | DDX6           | Cancer | 11  | 31     |                 | NA     | NA       |
| rs1013062  | DEK            | Cancer | 6   | 28     |                 | 55:45  | 0 vs. 23 |
| rs5998114  | DEPDC5         | Encode | 22  | 16     |                 | NA     | NA       |
| rs5998170  | DEPDC5         | Encode | 22  | 20     |                 | NA     | NA       |
| rs6623     | DGCR2          | Encode | 22  | 25     |                 | 50:50  | 9 vs. 1  |
| rs1640299  | DGCR8          | Encode | 22  | 35     |                 | 50:50  | 6 vs. 2  |
| rs7374     | DHCR24         | Cancer | 1   | 48     |                 | 50:50  | 1 vs. 12 |
| rs8990     | DHCR24         | Cancer | 1   | 15     |                 | 50:50  | 2 vs. 3  |
| rs2070435  | DIP2A          | Encode | 21  | 37     |                 | 50:50  | 0 vs. 26 |
| rs2078203  | DIP2A          | Encode | 21  | 33     |                 | 50:50  | 1 vs. 2  |
| rs2248636  | DIP2A          | Encode | 21  | 7      |                 | NA     | NA       |
| rs2255397  | DIP2A          | Encode | 21  | 24     |                 | 50:50  | 2 vs. 6  |
| rs7283507  | DIP2A          | Encode | 21  | 19     |                 | 55:45  | 5 vs. 6  |
| rs12133766 | DISC1          | Encode | 1   | 12     |                 | NA     | NA       |
| rs9090     | DKFZP564O0823  | Cancer | 4   | 5      |                 | 55:45  | 0 vs. 4  |
| rs17863986 | DKFZP686A10121 | Encode | 7   | 8      |                 | 55:45  | 4 vs. 1  |
| rs17863999 | DKFZP686A10121 | Encode | 7   | 30     |                 | 50:50  | 0 vs. 6  |
| rs42663    | DKFZP686A10121 | Encode | 7   | 29     |                 | 50:50  | 8 vs. 0  |
| rs12582    | DKFZp762E1312  | Encode | 2   | 19     |                 | 55:45  | 19 vs. 0 |
| rs702680   | DKFZP781I11119 | Encode | 5   | 39     |                 | 55:45  | 9 vs. 7  |
| rs702681   | DKFZP781I11119 | Encode | 5   | 32     |                 | 50:50  | 0 vs. 26 |
| rs2066575  | DLEU1          | Cancer | 13  | 27     | High variance   | 55:45  | 2 vs. 16 |
| rs1047775  | DNAJD1         | Cancer | 13  | 29     |                 | 55:45  | 0 vs. 14 |
| rs14040    | DNAL4          | Encode | 22  | 22     |                 | NA     | NA       |
| rs12877    | DNASE1L1       | Cancer | X   | 4      |                 | 80:20  | 3 vs. 1  |
| rs2070807  | DNASE1L1       | Encode | X   | 5      | High variance   | NA     | NA       |
| rs8111085  | DNMT1          | Cancer | 19  | 16     |                 | NA     | NA       |
| rs10904889 | DNMT2          | Cancer | 10  | 14     |                 | 60:40  | 0 vs. 12 |
| rs11254401 | DNMT2          | Cancer | 10  | 15     |                 | 55:45  | 0 vs. 11 |
| rs1893963  | DSC2           | Cancer | 18  | 14     | High variance   | NA     | NA       |
| rs14194    | DSCR2          | Encode | 21  | 36     |                 | 50:50  | 2 vs. 1  |
| rs2245455  | DSCR2          | Encode | 21  | 31     |                 | 50:50  | 4 vs. 1  |
| rs3165     | DSCR3          | Encode | 21  | 27     |                 | 55:45  | 25 vs. 0 |

| rs         | Gene      | Panel  | chr | # Hets | Variance & Mean | meanAI | A vs. B  |
|------------|-----------|--------|-----|--------|-----------------|--------|----------|
| rs3165     | DSCR3     | Cancer | 21  | 30     |                 | 50:50  | 1 vs. 11 |
| rs2277784  | DSCR6     | Encode | 21  | 5      |                 | NA     | NA       |
| rs4712138  | DST       | Cancer | 6   | 44     |                 | 50:50  | 5 vs. 3  |
| rs4715631  | DST       | Cancer | 6   | 42     |                 | 50:50  | 6 vs. 4  |
| rs8630     | DUSP18    | Encode | 22  | 30     |                 | 50:50  | 3 vs. 16 |
| rs11919795 | DVL3      | Cancer | 3   | 30     |                 | 55:45  | 2 vs. 18 |
| rs3749231  | DVL3      | Cancer | 3   | 38     |                 | 55:45  | 0 vs. 26 |
| rs12483205 | DYRK1A    | Encode | 21  | 29     |                 | 50:50  | 11 vs. 0 |
| rs1803439  | DYRK1A    | Encode | 21  | 34     |                 | 50:50  | 10 vs. 0 |
| rs2835726  | DYRK1A    | Encode | 21  | 40     |                 | 50:50  | 8 vs. 0  |
| rs5369     | EDN1      | Cancer | 6   | 15     |                 | NA     | NA       |
| rs5370     | EDN1      | Cancer | 6   | 35     |                 | 50:50  | 3 vs. 11 |
| rs5351     | EDNRB     | Cancer | 13  | 22     | High variance   | 70:30  | 3 vs. 13 |
| rs1390082  | EEF1A1    | Encode | 6   | 29     |                 | 55:45  | 2 vs. 18 |
| rs6694256  | EFNA1     | Cancer | 1   | 8      |                 | NA     | NA       |
| rs4947963  | EGFR      | Encode | 7   | 19     |                 | 60:40  | 4 vs. 8  |
| rs10897533 | EHD1      | Encode | 11  | 9      |                 | 55:45  | 0 vs. 8  |
| rs1211284  | EHD1      | Encode | 11  | 9      |                 | 50:50  | 2 vs. 0  |
| rs12573    | EHD1      | Encode | 11  | 16     |                 | 50:50  | 5 vs. 2  |
| rs2157472  | EIF3S6IP  | Encode | 22  | 32     |                 | 50:50  | 1 vs. 8  |
| rs9466     | EIF3S6IP  | Encode | 22  | 37     |                 | 60:40  | 37 vs. 0 |
| rs4820972  | EIF4ENIF1 | Encode | 22  | 8      |                 | NA     | NA       |
| rs5753627  | EIF4ENIF1 | Encode | 22  | 13     |                 | NA     | NA       |
| rs3844075  | ELL3      | Encode | 15  | 20     |                 | 55:45  | 3 vs. 7  |
| rs300239   | ENC1      | Cancer | 5   | 27     |                 | 65:35  | 1 vs. 23 |
| rs442425   | ENC1      | Cancer | 5   | 16     |                 | NA     | NA       |
| rs1046088  | EP300     | Encode | 22  | 8      |                 | NA     | NA       |
| rs2267424  | EP300     | Encode | 22  | 30     |                 | 55:45  | 2 vs. 15 |
| rs17567    | EPS15     | Cancer | 1   | 18     |                 | 50:50  | 1 vs. 8  |
| rs7308     | EPS15     | Cancer | 1   | 18     |                 | 65:35  | 0 vs. 18 |
| rs8664     | EPS8      | Cancer | 12  | 9      |                 | 50:50  | 2 vs. 2  |
| rs11615    | ERCC1     | Cancer | 19  | 35     |                 | 50:50  | 3 vs. 17 |
| rs1052559  | ERCC2     | Cancer | 19  | 35     |                 | 55:45  | 1 vs. 28 |
| rs13181    | ERCC2     | Cancer | 19  | 35     |                 | 55:45  | 1 vs. 24 |
| rs17655    | ERCC5     | Cancer | 13  | 33     |                 | 55:45  | 0 vs. 28 |
| rs2227869  | ERCC5     | Cancer | 13  | 11     |                 | NA     | NA       |
| rs2228528  | ERCC6     | Cancer | 10  | 31     |                 | 55:45  | 9 vs. 5  |
| rs2229760  | ERCC6     | Cancer | 10  | 27     |                 | 50:50  | 1 vs. 5  |
| rs3088093  | ERN1      | Cancer | 17  | 19     |                 | NA     | NA       |
| rs4937333  | ETS1      | Cancer | 11  | 35     |                 | 50:50  | 3 vs. 14 |
| rs8705     | ETS1      | Cancer | 11  | 26     |                 | 60:40  | 0 vs. 25 |
| rs1051420  | ETS2      | Cancer | 21  | 33     |                 | 50:50  | 8 vs. 1  |
| rs11254    | ETS2      | Cancer | 21  | 42     |                 | 50:50  | 10 vs. 4 |
| rs1209953  | ETS2      | Encode | 21  | 35     |                 | 55:45  | 9 vs. 9  |
| rs461155   | ETS2      | Encode | 21  | 16     |                 | NA     | NA       |
| rs1058028  | ETV6      | Cancer | 12  | 34     |                 | 50:50  | 28 vs. 0 |
| rs7505     | EVI2A     | Cancer | 17  | 39     |                 | 50:50  | 14 vs. 2 |
| rs2042456  | EXOC4     | Encode | 7   | 34     |                 | 50:50  | 0 vs. 22 |
| rs1801719  | F2R       | Cancer | 5   | 31     |                 | 60:40  | 26 vs. 0 |
| rs1050705  | F8        | Encode | X   | 12     | High variance   | 80:20  | 8 vs. 3  |
| rs1800291  | F8        | Encode | X   | 6      |                 | 85:15  | 2 vs. 4  |

| rs         | Gene     | Panel  | chr | # Hets | Variance & Mean | meanAI | A vs. B  |
|------------|----------|--------|-----|--------|-----------------|--------|----------|
| rs7647987  | FANCD2   | Cancer | 3   | 35     |                 | 55:45  | 3 vs. 19 |
| rs4447177  | FANCF    | Cancer | 11  | 10     |                 | 55:45  | 4 vs. 1  |
| rs848291   | FANCL    | Cancer | 2   | 41     |                 | 50:50  | 7 vs. 24 |
| rs1468063  | FAS      | Cancer | 10  | 11     |                 | NA     | NA       |
| rs710174   | FBXO7    | Encode | 22  | 32     |                 | 50:50  | 2 vs. 7  |
| rs8140067  | FBXO7    | Encode | 22  | 21     |                 | 50:50  | 0 vs. 1  |
| rs11264793 | FCRL3    | Encode | 1   | 24     |                 | 70:30  | 6 vs. 8  |
| rs6691569  | FCRL3    | Encode | 1   | 12     |                 | 75:25  | 9 vs. 3  |
| rs4246215  | FEN1     | Cancer | 11  | 39     |                 | 65:35  | 0 vs. 39 |
| rs1133392  | FER      | Cancer | 5   | 19     |                 | NA     | NA       |
| rs2229085  | FER      | Cancer | 5   | 36     |                 | 50:50  | 1 vs. 8  |
| rs919771   | FER      | Cancer | 5   | 23     |                 | 50:50  | 3 vs. 2  |
| rs1476217  | FGF2     | Cancer | 4   | 43     | High variance   | 60:40  | 8 vs. 23 |
| rs3747676  | FGF2     | Cancer | 4   | 42     | High variance   | 55:45  | 8 vs. 9  |
| rs546782   | FGF9     | Cancer | 13  | 10     | High variance   | NA     | NA       |
| rs1076890  | FGFR4    | Cancer | 5   | 5      |                 | 50:50  | 0 vs. 0  |
| rs9018     | FHL1     | Cancer | X   | 4      |                 | 85:15  | 2 vs. 2  |
| rs1046330  | FLJ10996 | Encode | 2   | 38     |                 | 50:50  | 1 vs. 1  |
| rs10490631 | FLJ10996 | Encode | 2   | 6      |                 | NA     | NA       |
| rs17512204 | FLJ10996 | Encode | 2   | 13     |                 | NA     | NA       |
| rs1048310  | FLJ20232 | Encode | 22  | 32     |                 | 50:50  | 0 vs. 11 |
| rs4821903  | FLJ20232 | Encode | 22  | 37     |                 | 50:50  | 3 vs. 9  |
| rs9615938  | FLJ20699 | Encode | 22  | 21     |                 | 55:45  | 1 vs. 15 |
| rs1029365  | FLJ21062 | Encode | 7   | 30     |                 | 60:40  | 1 vs. 16 |
| rs3761805  | FLJ21062 | Encode | 7   | 25     |                 | NA     | NA       |
| rs1053001  | FLJ21125 | Encode | 22  | 21     |                 | 50:50  | 1 vs. 7  |
| rs2277841  | FLJ23322 | Encode | 22  | 27     |                 | 55:45  | 0 vs. 19 |
| rs3747163  | FLJ23322 | Encode | 22  | 17     |                 | NA     | NA       |
| rs137794   | FLJ23588 | Encode | 22  | 11     |                 | NA     | NA       |
| rs2235432  | FLJ33814 | Encode | 22  | 7      |                 | NA     | NA       |
| rs5762795  | FLJ33814 | Encode | 22  | 34     |                 | 50:50  | 1 vs. 24 |
| rs2240176  | FLJ35801 | Encode | 22  | 18     |                 | 95:05  | 4 vs. 12 |
| rs1049739  | FOSB     | Cancer | 19  | 30     |                 | 55:45  | 1 vs. 15 |
| rs9471607  | FOXP4    | Encode | 6   | 11     |                 | 55:45  | 11 vs. 0 |
| rs792310   | FPGT     | Cancer | 1   | 50     |                 | 55:45  | 0 vs. 49 |
| rs1064261  | FRAP1    | Cancer | 1   | 29     |                 | 50:50  | 1 vs. 1  |
| rs495565   | FRK      | Cancer | 6   | 38     |                 | 50:50  | 9 vs. 5  |
| rs580396   | FRK      | Cancer | 6   | 38     |                 | 55:45  | 0 vs. 16 |
| rs1057227  | FRS3     | Encode | 6   | 33     |                 | 50:50  | 2 vs. 0  |
| rs6810     | FVT1     | Cancer | 18  | 33     |                 | 50:50  | 17 vs. 1 |
| rs1050757  | G6PD     | Encode | X   | 6      | Mean shifted    | 90:10  | 6 vs. 0  |
| rs3813455  | GAB3     | Encode | X   | 10     | High variance   | 85:15  | 4 vs. 5  |
| rs7283354  | GART     | Encode | 21  | 36     |                 | 50:50  | 5 vs. 7  |
| rs8971     | GART     | Encode | 21  | 35     |                 | 50:50  | 14 vs. 0 |
| rs9984077  | GART     | Encode | 21  | 19     |                 | 50:50  | 4 vs. 1  |
| rs1047365  | GAS7     | Cancer | 17  | 40     |                 | 50:50  | 14 vs. 7 |
| rs2240739  | GAS7     | Cancer | 17  | 36     |                 | 55:45  | 5 vs. 11 |
| rs2270121  | GAS7     | Cancer | 17  | 38     |                 | 60:40  | 1 vs. 26 |
| rs13911    | GCAT     | Encode | 22  | 31     |                 | 50:50  | 1 vs. 12 |
| rs989099   | GCC1     | Encode | 7   | 28     |                 | 50:50  | 27 vs. 0 |
| rs1325432  | GFI1     | Cancer | 1   | 11     |                 | 50:50  | 0 vs. 3  |



| rs         | Gene     | Panel  | chr | # Hets | Variance & Mean | meanAI | A vs. B   |
|------------|----------|--------|-----|--------|-----------------|--------|-----------|
| rs4970714  | GFI1     | Cancer | 1   | 43     |                 | 55:45  | 14 vs. 10 |
| rs12473304 | GFPT1    | Encode | 2   | 20     |                 | 50:50  | 10 vs. 0  |
| rs2667     | GFPT1    | Encode | 2   | 38     |                 | 50:50  | 1 vs. 5   |
| rs2269547  | GGA1     | Encode | 22  | 12     |                 | 50:50  | 5 vs. 0   |
| rs2228226  | GLI1     | Cancer | 12  | 38     |                 | 55:45  | 3 vs. 15  |
| rs7121     | GNAS     | Cancer | 20  | 38     |                 | 50:50  | 1 vs. 6   |
| rs9612234  | GNAZ     | Encode | 22  | 16     |                 | 65:35  | 2 vs. 8   |
| rs3752174  | GNG7     | Cancer | 19  | 29     |                 | 50:50  | 4 vs. 3   |
| rs712723   | GRM8     | Encode | 7   | 35     |                 | 55:45  | 21 vs. 1  |
| rs1571858  | GSTM3    | Encode | 1   | 17     | High variance   | 75:25  | 8 vs. 4   |
| rs4891     | GSTP1    | Cancer | 11  | 36     |                 | 50:50  | 3 vs. 0   |
| rs947894   | GSTP1    | Cancer | 11  | 36     |                 | 50:50  | 5 vs. 14  |
| rs140054   | GTSE1    | Encode | 22  | 10     |                 | NA     | NA        |
| rs6008622  | GTSE1    | Encode | 22  | 21     |                 | 50:50  | 0 vs. 7   |
| rs6008729  | GTSE1    | Encode | 22  | 21     |                 | 55:45  | 7 vs. 1   |
| rs9615947  | GTSE1    | Encode | 22  | 20     |                 | NA     | NA        |
| rs9530     | GUSB     | Cancer | 7   | 38     |                 | 50:50  | 3 vs. 9   |
| rs13385    | HBEGF    | Cancer | 5   | 14     |                 | NA     | NA        |
| rs7268     | HBEGF    | Cancer | 5   | 40     |                 | 55:45  | 8 vs. 11  |
| rs2276881  | HD       | Encode | 4   | 11     |                 | NA     | NA        |
| rs362272   | HD       | Encode | 4   | 27     |                 | 50:50  | 18 vs. 1  |
| rs362303   | HD       | Encode | 4   | 27     |                 | NA     | NA        |
| rs362331   | HD       | Encode | 4   | 33     |                 | 50:50  | 0 vs. 17  |
| rs363125   | HD       | Encode | 4   | 24     |                 | NA     | NA        |
| rs2408874  | HDAC7A   | Cancer | 12  | 28     |                 | 55:45  | 1 vs. 23  |
| rs7418     | HDAC7A   | Cancer | 12  | 30     |                 | 50:50  | 9 vs. 5   |
| rs2023938  | HDAC9    | Cancer | 7   | 18     |                 | NA     | NA        |
| rs801524   | HDAC9    | Cancer | 7   | 20     |                 | 50:50  | 0 vs. 3   |
| rs9842     | HDGF     | Cancer | 1   | 6      |                 | NA     | NA        |
| rs11549465 | HIF1A    | Cancer | 14  | 10     |                 | 50:50  | 5 vs. 0   |
| rs689797   | HISPPD2A | Encode | 15  | 36     |                 | 55:45  | 9 vs. 9   |
| rs11244    | HLA      | Cancer | 6   | 28     |                 | 55:45  | 0 vs. 24  |
| rs16871435 | HLA      | Cancer | 6   | 14     |                 | 70:30  | 0 vs. 14  |
| rs2070121  | HLA      | Cancer | 6   | 18     |                 | 50:50  | 1 vs. 9   |
| rs7194     | HLA      | Cancer | 6   | 42     |                 | 50:50  | 6 vs. 0   |
| rs7905     | HLA      | Cancer | 6   | 8      |                 | 50:50  | 1 vs. 2   |
| rs8084     | HLA      | Cancer | 6   | 42     |                 | 50:50  | 19 vs. 4  |
| rs8807     | HLA      | Cancer | 6   | 15     |                 | 60:40  | 14 vs. 0  |
| rs9273960  | HLA      | Cancer | 6   | 26     |                 | 55:45  | 0 vs. 22  |
| rs9277534  | HLA      | Cancer | 6   | 38     |                 | 50:50  | 21 vs. 3  |
| rs9277535  | HLA      | Cancer | 6   | 37     |                 | 50:50  | 12 vs. 6  |
| rs1053593  | HMG2L1   | Encode | 22  | 35     |                 | 50:50  | 0 vs. 24  |
| rs299290   | HMMR     | Cancer | 5   | 37     |                 | 50:50  | 1 vs. 8   |
| rs17759    | HNRPAB   | Cancer | 5   | 22     |                 | 50:50  | 11 vs. 2  |
| rs3747129  | HPS4     | Encode | 22  | 10     |                 | 60:40  | 0 vs. 10  |
| rs3747134  | HPS4     | Encode | 22  | 15     |                 | 55:45  | 0 vs. 15  |
| rs3752589  | HPS4     | Encode | 22  | 8      |                 | NA     | NA        |
| rs722997   | HPS4     | Encode | 22  | 8      |                 | NA     | NA        |
| rs3747011  | HRMT1L1  | Encode | 21  | 7      |                 | NA     | NA        |
| rs1061810  | HSD17B12 | Cancer | 11  | 34     |                 | 55:45  | 34 vs. 0  |
| rs5749426  | HSPC117  | Encode | 22  | 40     |                 | 50:50  | 1 vs. 17  |

| rs         | Gene     | Panel  | chr | # Hets | Variance & Mean | meanAI | A vs. B   |
|------------|----------|--------|-----|--------|-----------------|--------|-----------|
| rs1633445  | HTF9C    | Encode | 22  | 21     |                 | 55:45  | 0 vs. 17  |
| rs3093032  | ICAM1    | Cancer | 19  | 24     |                 | 50:50  | 4 vs. 1   |
| rs3746963  | ICOSLG   | Encode | 21  | 23     |                 | 50:50  | 2 vs. 4   |
| rs4819388  | ICOSLG   | Encode | 21  | 25     |                 | 55:45  | 18 vs. 0  |
| rs2257167  | IFNAR1   | Encode | 21  | 21     |                 | 50:50  | 5 vs. 4   |
| rs2834202  | IFNAR1   | Encode | 21  | 30     |                 | 50:50  | 0 vs. 16  |
| rs2856968  | IFNAR1   | Encode | 21  | 34     |                 | 60:40  | 0 vs. 27  |
| rs11088247 | IFNAR2   | Encode | 21  | 31     |                 | 55:45  | 0 vs. 29  |
| rs4986956  | IFNAR2   | Encode | 21  | 13     |                 | NA     | NA        |
| rs11914    | IFNGR1   | Cancer | 6   | 19     |                 | NA     | NA        |
| rs1059293  | IFNGR2   | Cancer | 21  | 44     |                 | 55:45  | 34 vs. 1  |
| rs6214     | IGF1     | Cancer | 12  | 31     | High variance   | 60:40  | 13 vs. 11 |
| rs6219     | IGF1     | Cancer | 12  | 6      |                 | NA     | NA        |
| rs998075   | IGF2R    | Cancer | 6   | 49     |                 | 50:50  | 0 vs. 18  |
| rs6670     | IGFBP3   | Cancer | 7   | 11     |                 | NA     | NA        |
| rs4445669  | IGSF4    | Cancer | 11  | 40     | High variance   | 70:30  | 5 vs. 23  |
| rs3024496  | IL10     | Cancer | 1   | 30     |                 | 50:50  | 3 vs. 8   |
| rs3024498  | IL10     | Cancer | 1   | 19     |                 | 55:45  | 10 vs. 2  |
| rs3024498  | IL10     | Encode | 1   | 18     |                 | 50:50  | 0 vs. 3   |
| rs2284552  | IL10RB   | Encode | 21  | 31     |                 | NA     | NA        |
| rs568408   | IL12A    | Cancer | 3   | 9      |                 | 50:50  | 0 vs. 0   |
| rs1368439  | IL12B    | Cancer | 5   | 23     |                 | NA     | NA        |
| rs1368439  | IL12B    | Encode | 5   | 10     |                 | 60:40  | 2 vs. 16  |
| rs1131445  | IL16     | Cancer | 15  | 33     |                 | NA     | NA        |
| rs3726     | IL16     | Cancer | 15  | 49     |                 | 50:50  | 3 vs. 17  |
| rs859      | IL16     | Cancer | 15  | 28     |                 | 50:50  | 0 vs. 12  |
| rs1025689  | IL17RB   | Cancer | 3   | 29     |                 | 65:35  | 1 vs. 19  |
| rs1043261  | IL17RB   | Cancer | 3   | 11     |                 | NA     | NA        |
| rs949323   | IL18BP   | Cancer | 11  | 6      |                 | NA     | NA        |
| rs1304037  | IL1A     | Cancer | 2   | 26     | High variance   | 75:25  | 8 vs. 12  |
| rs17561    | IL1A     | Cancer | 2   | 21     | High variance   | 75:25  | 8 vs. 8   |
| rs1071676  | IL1B     | Cancer | 2   | 29     | High variance   | 65:35  | 8 vs. 14  |
| rs1043388  | ILK      | Cancer | 11  | 28     |                 | 55:45  | 0 vs. 20  |
| rs1043390  | ILK      | Cancer | 11  | 30     |                 | 50:50  | 0 vs. 22  |
| rs2292195  | ILK      | Cancer | 11  | 27     |                 | 50:50  | 2 vs. 6   |
| rs1053474  | IMPACT   | Cancer | 18  | 31     |                 | 60:40  | 8 vs. 21  |
| rs677688   | IMPACT   | Cancer | 18  | 7      |                 | 65:35  | 1 vs. 5   |
| rs1061386  | ING1     | Cancer | 13  | 35     |                 | 55:45  | 0 vs. 33  |
| rs2962     | INSR     | Cancer | 19  | 5      |                 | NA     | NA        |
| rs1059701  | IRAK1    | Cancer | X   | 14     | High variance   | 85:15  | 6 vs. 8   |
| rs4251545  | IRAK4    | Cancer | 12  | 6      |                 | NA     | NA        |
| rs2289046  | IRS2     | Cancer | 13  | 22     |                 | 55:45  | 6 vs. 6   |
| rs2289047  | IRS2     | Cancer | 13  | 30     |                 | 55:45  | 2 vs. 13  |
| rs1316757  | ITGB1    | Cancer | 10  | 15     |                 | NA     | NA        |
| rs10593    | ITGB1BP1 | Cancer | 2   | 23     | High variance   | 65:35  | 10 vs. 10 |
| rs4798     | ITGB1BP1 | Cancer | 2   | 34     |                 | 60:40  | 2 vs. 25  |
| rs235326   | ITGB2    | Encode | 21  | 17     |                 | NA     | NA        |
| rs684      | ITGB2    | Encode | 21  | 33     |                 | 50:50  | 1 vs. 13  |
| rs1900941  | ITPR2    | Cancer | 12  | 42     |                 | 50:50  | 9 vs. 2   |
| rs2291264  | ITPR2    | Cancer | 12  | 40     |                 | 55:45  | 4 vs. 27  |
| rs2229634  | ITPR3    | Cancer | 6   | 40     |                 | 60:40  | 3 vs. 25  |

| rs         | Gene      | Panel  | chr | # Hets | Variance & Mean | meanAI | A vs. B   |
|------------|-----------|--------|-----|--------|-----------------|--------|-----------|
| rs749338   | ITPR3     | Cancer | 6   | 23     |                 | 60:40  | 1 vs. 8   |
| rs7828     | JAG1      | Cancer | 20  | 21     |                 | 50:50  | 8 vs. 6   |
| rs2230724  | JAK2      | Cancer | 9   | 40     |                 | 55:45  | 2 vs. 23  |
| rs7048717  | JAK2      | Cancer | 9   | 40     |                 | 55:45  | 1 vs. 24  |
| rs3008     | JAK3      | Cancer | 19  | 41     |                 | 50:50  | 4 vs. 7   |
| rs2829877  | JAM2      | Encode | 21  | 17     |                 | 60:40  | 4 vs. 7   |
| rs4816260  | JAM2      | Encode | 21  | 25     |                 | 55:45  | 12 vs. 5  |
| rs4980809  | JARID1A   | Cancer | 12  | 24     |                 | 50:50  | 5 vs. 4   |
| rs3827358  | JOSD1     | Encode | 22  | 11     |                 | 50:50  | 0 vs. 1   |
| rs4820345  | JOSD1     | Encode | 22  | 25     |                 | 55:45  | 0 vs. 18  |
| rs10478    | KATNAL1   | Encode | 13  | 29     |                 | 50:50  | 6 vs. 2   |
| rs2230033  | KCNJ15    | Encode | 21  | 33     |                 | 60:40  | 4 vs. 11  |
| rs10798    | KCNQ1     | Cancer | 11  | 31     | High variance   | 75:25  | 15 vs. 13 |
| rs1543621  | KCNQ5     | Encode | 6   | 41     |                 | 50:50  | 0 vs. 2   |
| rs7282122  | KIAA0179  | Encode | 21  | 42     |                 | 50:50  | 1 vs. 21  |
| rs3747113  | KIAA0376  | Encode | 22  | 26     |                 | 50:50  | 1 vs. 6   |
| rs1665105  | KIAA0828  | Cancer | 7   | 30     |                 | 55:45  | 8 vs. 10  |
| rs4731575  | KIAA0828  | Cancer | 7   | 30     |                 | 50:50  | 2 vs. 13  |
| rs10047459 | KIAA0999  | Encode | 11  | 10     |                 | NA     | NA        |
| rs12225230 | KIAA0999  | Encode | 11  | 18     |                 | 55:45  | 0 vs. 16  |
| rs11242126 | KIF3A     | Encode | 5   | 14     |                 | 55:45  | 0 vs. 10  |
| rs140519   | KLHDC7B   | Encode | 22  | 30     |                 | 70:30  | 1 vs. 28  |
| rs8353     | KLHL22    | Encode | 22  | 30     |                 | 55:45  | 0 vs. 18  |
| rs1137282  | KRAS      | Cancer | 12  | 37     |                 | 50:50  | 6 vs. 4   |
| rs12587    | KRAS      | Cancer | 12  | 46     |                 | 50:50  | 21 vs. 2  |
| rs13096    | KRAS      | Cancer | 12  | 45     |                 | 60:40  | 0 vs. 38  |
| rs9266     | KRAS      | Cancer | 12  | 46     |                 | 50:50  | 20 vs. 5  |
| rs7561     | LAMB1     | Cancer | 7   | 21     | High variance   | 70:30  | 10 vs. 3  |
| rs16992034 | LARGE     | Encode | 22  | 9      |                 | NA     | NA        |
| rs86487    | LARGE     | Encode | 22  | 31     |                 | 55:45  | 7 vs. 9   |
| rs708459   | LEAP-2    | Encode | 5   | 40     |                 | 55:45  | 0 vs. 27  |
| rs1050527  | LENG4     | Encode | 19  | 10     |                 | NA     | NA        |
| rs10131    | LIG4      | Cancer | 13  | 10     | High variance   | 60:40  | 0 vs. 10  |
| rs1805388  | LIG4      | Cancer | 13  | 24     |                 | 50:50  | 3 vs. 7   |
| rs8101605  | LILRB1    | Encode | 19  | 17     |                 | 55:45  | 14 vs. 1  |
| rs3745410  | LILRB3    | Encode | 19  | 5      | High variance   | NA     | NA        |
| rs17207369 | LILRP2    | Encode | 19  | 18     |                 | 65:35  | 4 vs. 12  |
| rs4141404  | LIMK2     | Encode | 22  | 30     |                 | 50:50  | 7 vs. 4   |
| rs1051643  | LMNB1     | Cancer | 5   | 35     |                 | 50:50  | 4 vs. 6   |
| rs3749830  | LMNB1     | Cancer | 5   | 11     |                 | NA     | NA        |
| rs2298428  | LOC150223 | Encode | 22  | 19     |                 | NA     | NA        |
| rs2269729  | LOC168850 | Encode | 7   | 28     |                 | 65:35  | 0 vs. 27  |
| rs6518322  | LOC284837 | Encode | 21  | 29     |                 | 60:40  | 8 vs. 12  |
| rs41173    | LOC400924 | Encode | 22  | 31     |                 | 55:45  | 8 vs. 10  |
| rs1045523  | LOC402055 | Encode | 22  | 15     |                 | 50:50  | 1 vs. 0   |
| rs4820682  | LOC402055 | Encode | 22  | 15     |                 | 55:45  | 1 vs. 11  |
| rs5761561  | LOC402055 | Encode | 22  | 22     |                 | NA     | NA        |
| rs10071051 | LOC441108 | Encode | 5   | 39     |                 | 55:45  | 4 vs. 29  |
| rs2522050  | LOC441108 | Encode | 5   | 26     |                 | 50:50  | 0 vs. 15  |
| rs2286442  | LOC550631 | Encode | 22  | 12     |                 | NA     | NA        |
| rs9624806  | LRP5L     | Encode | 22  | 15     |                 | 55:45  | 5 vs. 3   |

| rs         | Gene     | Panel  | chr | # Hets | Variance & Mean | meanAI | A vs. B  |
|------------|----------|--------|-----|--------|-----------------|--------|----------|
| rs9071     | LRRRC14  | Cancer | 8   | 34     |                 | 50:50  | 2 vs. 20 |
| rs1048326  | LRRK1    | Cancer | 15  | 9      |                 | NA     | NA       |
| rs2089910  | LSP1     | Encode | 11  | 33     |                 | 50:50  | 0 vs. 3  |
| rs5013907  | LSP1     | Encode | 11  | 5      |                 | NA     | NA       |
| rs548195   | LSP1     | Encode | 11  | 20     |                 | NA     | NA       |
| rs2254522  | LSS      | Encode | 21  | 23     |                 | NA     | NA       |
| rs2839158  | LSS      | Encode | 21  | 27     |                 | 55:45  | 1 vs. 26 |
| rs2968     | LSS      | Encode | 21  | 36     |                 | 50:50  | 0 vs. 17 |
| rs914247   | LSS      | Encode | 21  | 34     |                 | 55:45  | 0 vs. 21 |
| rs2239704  | LTA      | Cancer | 6   | 39     |                 | 55:45  | 0 vs. 19 |
| rs2857713  | LTA      | Cancer | 6   | 39     |                 | 60:40  | 0 vs. 35 |
| rs2857713  | LTA      | Encode | 6   | 35     |                 | 55:45  | 0 vs. 34 |
| rs7289487  | LZTR1    | Encode | 22  | 25     |                 | 55:45  | 1 vs. 6  |
| rs1059442  | MALT1    | Cancer | 18  | 16     |                 | NA     | NA       |
| rs4792219  | MAP2K4   | Cancer | 17  | 46     |                 | 65:35  | 0 vs. 46 |
| rs2072074  | MAP2K6   | Cancer | 17  | 16     |                 | 50:50  | 1 vs. 3  |
| rs832582   | MAP3K1   | Cancer | 5   | 19     |                 | 55:45  | 0 vs. 11 |
| rs832583   | MAP3K1   | Cancer | 5   | 19     |                 | 50:50  | 2 vs. 5  |
| rs1042058  | MAP3K8   | Cancer | 10  | 43     |                 | 55:45  | 0 vs. 32 |
| rs958      | MAPK10   | Cancer | 4   | 28     |                 | 60:40  | 1 vs. 14 |
| rs2272857  | MAPK12   | Encode | 22  | 28     |                 | 50:50  | 7 vs. 9  |
| rs3804451  | MAPK14   | Cancer | 6   | 11     |                 | NA     | NA       |
| rs8510     | MAPK14   | Cancer | 6   | 6      |                 | 50:50  | 0 vs. 3  |
| rs9605     | MAPK9    | Cancer | 5   | 36     |                 | 55:45  | 1 vs. 30 |
| rs3786254  | MBD2     | Cancer | 18  | 34     |                 | 50:50  | 2 vs. 12 |
| rs7614     | MBD2     | Cancer | 18  | 42     |                 | 50:50  | 16 vs. 6 |
| rs7914     | MCAM     | Cancer | 11  | 31     | High variance   | 60:40  | 3 vs. 14 |
| rs878471   | MCL1     | Cancer | 1   | 32     |                 | 50:50  | 11 vs. 1 |
| rs11702450 | MCM3AP   | Encode | 21  | 39     |                 | 60:40  | 2 vs. 35 |
| rs2839165  | MCM3AP   | Encode | 21  | 22     |                 | 50:50  | 0 vs. 6  |
| rs2839181  | MCM3AP   | Encode | 21  | 40     |                 | 60:40  | 1 vs. 20 |
| rs9975588  | MCM3AP   | Encode | 21  | 37     |                 | 50:50  | 1 vs. 5  |
| rs4645824  | MCM5     | Encode | 22  | 13     |                 | NA     | NA       |
| rs3087350  | MCM6     | Cancer | 2   | 9      |                 | NA     | NA       |
| rs1055521  | MDFIC    | Encode | 7   | 24     |                 | 50:50  | 0 vs. 19 |
| rs2709507  | MDFIC    | Encode | 7   | 6      |                 | NA     | NA       |
| rs769412   | MDM2     | Cancer | 12  | 6      |                 | NA     | NA       |
| rs4245739  | MDM4     | Cancer | 1   | 34     |                 | 50:50  | 1 vs. 9  |
| rs4252745  | MDM4     | Cancer | 1   | 42     |                 | 50:50  | 1 vs. 1  |
| rs2734647  | MECP2    | Cancer | X   | 12     | High variance   | 85:15  | 6 vs. 6  |
| rs2734647  | MECP2    | Encode | X   | 10     |                 | 85:15  | 4 vs. 6  |
| rs10863    | MEST     | Cancer | 7   | 29     | High variance   | 70:30  | 18 vs. 5 |
| rs16965120 | MFAP1    | Encode | 15  | 7      |                 | NA     | NA       |
| rs2228368  | MFAP1    | Encode | 15  | 7      |                 | NA     | NA       |
| rs11216129 | MGC13125 | Encode | 11  | 15     |                 | NA     | NA       |
| rs4615     | MGC17330 | Encode | 22  | 9      |                 | NA     | NA       |
| rs4820961  | MGC17330 | Encode | 22  | 21     |                 | 55:45  | 2 vs. 13 |
| rs2257505  | MGC33648 | Encode | 5   | 29     |                 | 60:40  | 0 vs. 20 |
| rs33321    | MGC33648 | Encode | 5   | 39     |                 | 55:45  | 2 vs. 19 |
| rs40497    | MGC33648 | Encode | 5   | 37     |                 | 55:45  | 5 vs. 11 |
| rs16989427 | MGC50372 | Encode | 22  | 7      |                 | NA     | NA       |

| rs         | Gene   | Panel  | chr | # Hets | Variance & Mean | meanAI | A vs. B  |
|------------|--------|--------|-----|--------|-----------------|--------|----------|
| rs1803965  | MGMT   | Cancer | 10  | 5      |                 | 70:30  | 3 vs. 1  |
| rs4821944  | MKL1   | Encode | 22  | 30     |                 | 55:45  | 0 vs. 18 |
| rs1050629  | MLF2   | Cancer | 12  | 9      |                 | NA     | NA       |
| rs2302371  | MLF2   | Cancer | 12  | 23     |                 | 60:40  | 0 vs. 17 |
| rs6906754  | MLLT4  | Cancer | 6   | 9      |                 | NA     | NA       |
| rs10502001 | MMP7   | Cancer | 11  | 19     | High variance   | 55:45  | 2 vs. 3  |
| rs14983    | MMP7   | Cancer | 11  | 22     | High variance   | 55:45  | 5 vs. 6  |
| rs2072132  | MORC2  | Encode | 22  | 32     |                 | 55:45  | 17 vs. 0 |
| rs737924   | MORC2  | Encode | 22  | 31     |                 | 50:50  | 2 vs. 7  |
| rs15017    | MOXD1  | Encode | 6   | 6      | High variance   | 60:40  | 1 vs. 3  |
| rs3734744  | MOXD1  | Encode | 6   | 11     |                 | 60:40  | 7 vs. 2  |
| rs2155209  | MRE11A | Cancer | 11  | 32     |                 | 55:45  | 0 vs. 15 |
| rs12812    | MRPL23 | Encode | 11  | 15     |                 | 50:50  | 1 vs. 3  |
| rs1135638  | MRPL39 | Encode | 21  | 25     |                 | 50:50  | 9 vs. 0  |
| rs3178972  | MRPL39 | Encode | 21  | 25     |                 | 55:45  | 0 vs. 20 |
| rs13052524 | MRPS6  | Encode | 21  | 19     |                 | NA     | NA       |
| rs7115     | MRPS6  | Encode | 21  | 39     |                 | 50:50  | 19 vs. 0 |
| rs1805355  | MSH3   | Cancer | 5   | 5      |                 | 50:50  | 0 vs. 1  |
| rs184967   | MSH3   | Cancer | 5   | 8      |                 | NA     | NA       |
| rs1800935  | MSH6   | Cancer | 2   | 36     |                 | 50:50  | 1 vs. 5  |
| rs13815    | MT     | Encode | 22  | 29     |                 | 55:45  | 0 vs. 22 |
| rs2066910  | MT     | Encode | 22  | 25     |                 | 60:40  | 0 vs. 20 |
| rs1801131  | MTHFR  | Cancer | 1   | 30     |                 | 55:45  | 2 vs. 14 |
| rs16988135 | MTMR3  | Encode | 22  | 24     |                 | NA     | NA       |
| rs3788418  | MTMR3  | Encode | 22  | 17     |                 | 60:40  | 17 vs. 0 |
| rs4509087  | MTO1   | Encode | 6   | 17     |                 | 50:50  | 0 vs. 4  |
| rs1050008  | MX1    | Encode | 21  | 11     |                 | NA     | NA       |
| rs2070229  | MX1    | Encode | 21  | 33     |                 | 50:50  | 26 vs. 2 |
| rs461093   | MX1    | Encode | 21  | 29     |                 | 55:45  | 0 vs. 18 |
| rs467960   | MX1    | Encode | 21  | 35     |                 | 50:50  | 4 vs. 3  |
| rs14401    | MXI1   | Cancer | 10  | 42     |                 | 55:45  | 2 vs. 25 |
| rs17658    | MXI1   | Cancer | 10  | 38     |                 | 50:50  | 4 vs. 12 |
| rs2070583  | MYC    | Cancer | 8   | 11     |                 | NA     | NA       |
| rs2481     | MYH9   | Encode | 22  | 16     |                 | NA     | NA       |
| rs5756130  | MYH9   | Encode | 22  | 9      |                 | NA     | NA       |
| rs735854   | MYH9   | Encode | 22  | 29     |                 | 50:50  | 2 vs. 4  |
| rs1061302  | NBS1   | Cancer | 8   | 38     |                 | 50:50  | 1 vs. 20 |
| rs1063045  | NBS1   | Cancer | 8   | 38     |                 | 50:50  | 3 vs. 27 |
| rs2072712  | NCF4   | Encode | 22  | 9      |                 | NA     | NA       |
| rs1131171  | NCL    | Cancer | 2   | 20     |                 | 50:50  | 1 vs. 5  |
| rs2076546  | NCOA3  | Cancer | 20  | 8      |                 | 50:50  | 1 vs. 2  |
| rs2230782  | NCOA3  | Cancer | 20  | 19     |                 | 50:50  | 3 vs. 3  |
| rs9394782  | NCR2   | Encode | 6   | 15     |                 | 75:25  | 0 vs. 11 |
| rs1801311  | NDUFA6 | Encode | 22  | 37     |                 | 50:50  | 10 vs. 2 |
| rs4147641  | NDUFA6 | Encode | 22  | 37     |                 | 50:50  | 21 vs. 3 |
| rs7245     | NDUFA6 | Encode | 22  | 37     |                 | 50:50  | 0 vs. 12 |
| rs2839600  | NDUFV3 | Encode | 21  | 17     |                 | 60:40  | 0 vs. 16 |
| rs4148972  | NDUFV3 | Encode | 21  | 8      |                 | NA     | NA       |
| rs165602   | NEFH   | Encode | 22  | 6      |                 | 70:30  | 4 vs. 1  |
| rs1801052  | NF1    | Cancer | 17  | 41     |                 | 50:50  | 3 vs. 2  |
| rs1008515  | NF2    | Cancer | 22  | 9      |                 | NA     | NA       |

| rs         | Gene     | Panel  | chr | # Hets | Variance & Mean | meanAI | A vs. B   |
|------------|----------|--------|-----|--------|-----------------|--------|-----------|
| rs1008515  | NF2      | Encode | 22  | 27     |                 | NA     | NA        |
| rs1057157  | NFAM1    | Encode | 22  | 41     |                 | 50:50  | 9 vs. 11  |
| rs1609993  | NFKB1    | Cancer | 4   | 5      |                 | NA     | NA        |
| rs11574851 | NFKB2    | Cancer | 10  | 6      |                 | NA     | NA        |
| rs10782383 | NFKBIA   | Cancer | 14  | 37     |                 | 50:50  | 14 vs. 18 |
| rs6121023  | NFS1     | Encode | 20  | 14     |                 | 50:50  | 4 vs. 0   |
| rs132806   | NHP2L1   | Encode | 22  | 33     |                 | 50:50  | 0 vs. 5   |
| rs3213190  | NID      | Cancer | 1   | 17     |                 | NA     | NA        |
| rs469363   | NIPSNAP1 | Encode | 22  | 21     |                 | 55:45  | 2 vs. 6   |
| rs7609     | NIPSNAP1 | Encode | 22  | 26     |                 | 55:45  | 1 vs. 18  |
| rs699780   | NOTCH2   | Cancer | 1   | 11     |                 | 55:45  | 9 vs. 0   |
| rs835575   | NOTCH2   | Cancer | 1   | 8      |                 | 60:40  | 0 vs. 7   |
| rs835576   | NOTCH2   | Cancer | 1   | 10     |                 | 55:45  | 5 vs. 0   |
| rs1800566  | NQO1     | Cancer | 16  | 26     |                 | 55:45  | 7 vs. 7   |
| rs2288539  | NR2F6    | Cancer | 19  | 18     | Mean shifted    | NA     | NA        |
| rs14804    | NRAS     | Cancer | 1   | 17     |                 | 50:50  | 0 vs. 0   |
| rs1056947  | NRIP1    | Encode | 21  | 34     |                 | 55:45  | 12 vs. 8  |
| rs17066360 | NUFIP1   | Cancer | 13  | 5      |                 | NA     | NA        |
| rs2673084  | NUP50    | Encode | 22  | 39     |                 | 60:40  | 1 vs. 37  |
| rs2459216  | OAT      | Cancer | 10  | 6      | High variance   | NA     | NA        |
| rs10742622 | OR51B2   | Encode | 11  | 9      |                 | NA     | NA        |
| rs7934354  | OR52H1   | Encode | 11  | 9      |                 | NA     | NA        |
| rs7397032  | OR56B1   | Encode | 11  | 17     |                 | NA     | NA        |
| rs11681    | PALM2    | Cancer | 9   | 12     |                 | NA     | NA        |
| rs1983609  | PARVB    | Encode | 22  | 22     |                 | 50:50  | 0 vs. 12  |
| rs4819157  | PCBP3    | Encode | 21  | 6      | High variance   | NA     | NA        |
| rs1042531  | PCK1     | Encode | 20  | 9      |                 | 65:35  | 6 vs. 1   |
| rs2073376  | PCNT     | Encode | 21  | 35     |                 | 55:45  | 2 vs. 16  |
| rs2249057  | PCNT     | Encode | 21  | 36     |                 | 55:45  | 0 vs. 29  |
| rs2839245  | PCNT     | Encode | 21  | 19     |                 | NA     | NA        |
| rs6518291  | PCNT     | Encode | 21  | 30     |                 | 55:45  | 21 vs. 0  |
| rs2066954  | PDCD2    | Cancer | 6   | 45     |                 | 50:50  | 10 vs. 3  |
| rs8770     | PDCD2    | Cancer | 6   | 49     |                 | 55:45  | 45 vs. 0  |
| rs702530   | PDE4D    | Encode | 5   | 42     |                 | 55:45  | 2 vs. 28  |
| rs10163054 | PDIA3    | Encode | 15  | 7      |                 | NA     | NA        |
| rs1053492  | PDIA3    | Encode | 15  | 36     |                 | 50:50  | 0 vs. 18  |
| rs3087657  | PDIA3    | Encode | 15  | 37     |                 | 50:50  | 6 vs. 0   |
| rs2812     | PECAM1   | Cancer | 17  | 30     |                 | 55:45  | 2 vs. 13  |
| rs6809     | PECAM1   | Cancer | 17  | 37     |                 | 50:50  | 6 vs. 5   |
| rs13073    | PEG10    | Cancer | 7   | 35     | High variance   | 95:05  | 21 vs. 14 |
| rs3750105  | PEG10    | Cancer | 7   | 8      | High variance   | NA     | NA        |
| rs7810469  | PEG10    | Cancer | 7   | 12     | High variance   | 95:05  | 5 vs. 7   |
| rs464385   | PEX26    | Encode | 22  | 38     |                 | 50:50  | 2 vs. 9   |
| rs1057034  | PFKL     | Encode | 21  | 40     |                 | 50:50  | 5 vs. 2   |
| rs11771034 | PFTK1    | Encode | 7   | 18     |                 | 50:50  | 2 vs. 4   |
| rs994511   | PFTK1    | Encode | 7   | 39     |                 | 50:50  | 8 vs. 10  |
| rs1065201  | PGEA1    | Encode | 22  | 25     |                 | 50:50  | 0 vs. 3   |
| rs5757213  | PGEA1    | Encode | 22  | 25     |                 | 50:50  | 3 vs. 3   |
| rs1049620  | PHB      | Cancer | 17  | 18     |                 | 50:50  | 3 vs. 8   |
| rs3729680  | PIK3CA   | Cancer | 3   | 5      |                 | NA     | NA        |
| rs3730089  | PIK3R1   | Cancer | 5   | 38     |                 | 50:50  | 1 vs. 9   |

| rs         | Gene    | Panel  | chr | # Hets | Variance & Mean | meanAI | A vs. B   |
|------------|---------|--------|-----|--------|-----------------|--------|-----------|
| rs706713   | PIK3R1  | Cancer | 5   | 29     |                 | 50:50  | 7 vs. 4   |
| rs1056847  | PIK4CB  | Encode | 1   | 34     |                 | 50:50  | 1 vs. 2   |
| rs1044085  | PISD    | Encode | 22  | 18     |                 | 55:45  | 1 vs. 16  |
| rs2728121  | PKD2    | Cancer | 4   | 9      |                 | 50:50  | 1 vs. 1   |
| rs378528   | PKNOX1  | Encode | 21  | 31     |                 | 50:50  | 3 vs. 18  |
| rs413621   | PKNOX1  | Encode | 21  | 14     |                 | 55:45  | 0 vs. 13  |
| rs2076684  | PLAGL1  | Cancer | 6   | 12     |                 | NA     | NA        |
| rs9373409  | PLAGL1  | Cancer | 6   | 43     |                 | 55:45  | 4 vs. 15  |
| rs6061216  | PLAGL2  | Cancer | 20  | 42     |                 | 50:50  | 0 vs. 19  |
| rs2302524  | PLAUR   | Cancer | 19  | 15     |                 | NA     | NA        |
| rs2075760  | PLSCR3  | Cancer | 17  | 19     |                 | 65:35  | 3 vs. 9   |
| rs3817405  | PLXDC2  | Cancer | 10  | 12     | High variance   | 75:25  | 2 vs. 8   |
| rs5945431  | PLXNA3  | Encode | X   | 9      | High variance   | 85:15  | 7 vs. 2   |
| rs5987266  | PLXNA3  | Encode | X   | 10     | High variance   | 85:15  | 7 vs. 2   |
| rs9479     | PML     | Cancer | 15  | 36     |                 | 55:45  | 31 vs. 0  |
| rs2066459  | PMS1    | Cancer | 2   | 8      |                 | NA     | NA        |
| rs2297285  | POFUT2  | Encode | 21  | 28     |                 | 50:50  | 6 vs. 2   |
| rs2838859  | POFUT2  | Encode | 21  | 40     |                 | 50:50  | 17 vs. 3  |
| rs216590   | POLR3K  | Encode | 16  | 32     |                 | 50:50  | 10 vs. 6  |
| rs1053046  | PPARD   | Cancer | 6   | 6      |                 | NA     | NA        |
| rs3856806  | PPARG   | Encode | 3   | 5      | High variance   | 65:35  | 2 vs. 1   |
| rs1042040  | PPAT    | Cancer | 4   | 51     |                 | 50:50  | 0 vs. 40  |
| rs3733326  | PPAT    | Cancer | 4   | 6      |                 | NA     | NA        |
| rs1103229  | PPIL2   | Encode | 22  | 26     |                 | 60:40  | 0 vs. 22  |
| rs10413435 | PPP2R1A | Cancer | 19  | 9      |                 | NA     | NA        |
| rs2480452  | PPP2R4  | Encode | 9   | 7      |                 | NA     | NA        |
| rs11264542 | PRCC    | Cancer | 1   | 23     |                 | 55:45  | 5 vs. 11  |
| rs1203651  | PRDM2   | Cancer | 1   | 15     |                 | 55:45  | 0 vs. 12  |
| rs3795753  | PRDM2   | Cancer | 1   | 11     |                 | 50:50  | 4 vs. 1   |
| rs6958     | PRKAR1A | Cancer | 17  | 28     |                 | 55:45  | 28 vs. 0  |
| rs8905     | PRKAR1A | Cancer | 17  | 12     |                 | 55:45  | 10 vs. 0  |
| rs1051992  | PRKCDBP | Cancer | 11  | 37     |                 | 60:40  | 4 vs. 16  |
| rs2239822  | PSCD4   | Encode | 22  | 33     |                 | 55:45  | 10 vs. 11 |
| rs7172     | PSMB4   | Encode | 1   | 27     |                 | 50:50  | 0 vs. 23  |
| rs2295997  | PTCH2   | Cancer | 1   | 22     |                 | NA     | NA        |
| rs17197    | PTGER2  | Encode | 14  | 10     |                 | 70:30  | 8 vs. 0   |
| rs2206593  | PTGS2   | Cancer | 1   | 10     | High variance   | 60:40  | 1 vs. 5   |
| rs5275     | PTGS2   | Cancer | 1   | 41     |                 | 60:40  | 4 vs. 17  |
| rs7460     | PTK2    | Cancer | 8   | 42     |                 | 50:50  | 4 vs. 10  |
| rs1030526  | PTK2B   | Cancer | 8   | 40     |                 | 50:50  | 10 vs. 17 |
| rs16997057 | PTPNS1  | Cancer | 20  | 26     |                 | 65:35  | 0 vs. 26  |
| rs11312    | PTTG1IP | Encode | 21  | 36     |                 | 50:50  | 3 vs. 17  |
| rs2020945  | PWP2H   | Encode | 21  | 18     |                 | NA     | NA        |
| rs4767884  | PXN     | Cancer | 12  | 26     |                 | 70:30  | 2 vs. 23  |
| rs12166968 | RAC2    | Encode | 22  | 5      |                 | NA     | NA        |
| rs2239774  | RAC2    | Encode | 22  | 17     |                 | NA     | NA        |
| rs8240     | RAD23A  | Cancer | 19  | 9      |                 | NA     | NA        |
| rs12593359 | RAD51   | Cancer | 15  | 44     |                 | 60:40  | 5 vs. 33  |
| rs1051672  | RAD52   | Cancer | 12  | 25     |                 | 50:50  | 7 vs. 6   |
| rs7301931  | RAD52   | Cancer | 12  | 45     |                 | 50:50  | 6 vs. 14  |
| rs7310449  | RAD52   | Cancer | 12  | 47     |                 | 55:45  | 0 vs. 36  |

| rs         | Gene      | Panel  | chr | # Hets | Variance & Mean | meanAI | A vs. B   |
|------------|-----------|--------|-----|--------|-----------------|--------|-----------|
| rs1048771  | RAD54L    | Cancer | 1   | 16     |                 | NA     | NA        |
| rs1051208  | RAF1      | Cancer | 3   | 11     |                 | NA     | NA        |
| rs1065518  | RALB      | Cancer | 2   | 25     |                 | 50:50  | 1 vs. 2   |
| rs14035    | RAN       | Cancer | 12  | 23     |                 | 55:45  | 1 vs. 11  |
| rs1953     | RANGAP1   | Encode | 22  | 19     |                 | 50:50  | 1 vs. 3   |
| rs6573     | RAP1A     | Cancer | 1   | 9      |                 | NA     | NA        |
| rs12873919 | RAP2A     | Cancer | 13  | 40     |                 | 50:50  | 7 vs. 1   |
| rs2389910  | RAP2A     | Cancer | 13  | 38     |                 | 50:50  | 0 vs. 0   |
| rs2073498  | RASSF1    | Cancer | 3   | 23     |                 | 55:45  | 0 vs. 11  |
| rs11240353 | RBBP5     | Cancer | 1   | 16     |                 | 55:45  | 0 vs. 13  |
| rs7593     | RBBP6     | Cancer | 16  | 32     |                 | 50:50  | 3 vs. 1   |
| rs10748    | RBL2      | Cancer | 16  | 44     |                 | 50:50  | 17 vs. 0  |
| rs3929     | RBL2      | Cancer | 16  | 44     |                 | 50:50  | 0 vs. 32  |
| rs2822445  | RBM11     | Encode | 21  | 38     |                 | 60:40  | 6 vs. 19  |
| rs6060536  | RBM12     | Encode | 20  | 14     |                 | 50:50  | 0 vs. 11  |
| rs1061474  | RBM5      | Cancer | 3   | 51     |                 | 50:50  | 3 vs. 14  |
| rs522162   | RDBP      | Cancer | 6   | 7      |                 | NA     | NA        |
| rs1061627  | RECQL     | Cancer | 12  | 26     |                 | 50:50  | 4 vs. 0   |
| rs1047148  | RFC4      | Cancer | 3   | 34     |                 | 50:50  | 11 vs. 7  |
| rs7552906  | RFX5      | Encode | 1   | 30     |                 | 55:45  | 0 vs. 25  |
| rs3448     | RHOA      | Cancer | 3   | 44     |                 | 50:50  | 12 vs. 23 |
| rs2245466  | RHOH      | Cancer | 4   | 33     |                 | 50:50  | 1 vs. 9   |
| rs1022477  | RIBC2     | Encode | 22  | 26     |                 | 70:30  | 0 vs. 20  |
| rs3212254  | RIPK3     | Cancer | 14  | 10     |                 | NA     | NA        |
| rs10889205 | RLF       | Cancer | 1   | 27     |                 | 55:45  | 0 vs. 18  |
| rs3812471  | RNF139    | Cancer | 8   | 31     |                 | 50:50  | 9 vs. 0   |
| rs5749222  | RNF185    | Encode | 22  | 24     |                 | 50:50  | 2 vs. 9   |
| rs8595     | RNF185    | Encode | 22  | 20     |                 | 60:40  | 0 vs. 20  |
| rs12727    | RPA1      | Cancer | 17  | 15     |                 | 55:45  | 0 vs. 14  |
| rs1131274  | RYK       | Cancer | 3   | 23     |                 | 65:35  | 0 vs. 23  |
| rs1047325  | S100A2    | Cancer | 1   | 10     |                 | 50:50  | 0 vs. 0   |
| rs7281104  | SAMSN1    | Encode | 21  | 18     |                 | 50:50  | 5 vs. 3   |
| rs8142229  | SAPS2     | Encode | 22  | 35     |                 | 55:45  | 1 vs. 15  |
| rs503068   | SEC63     | Encode | 6   | 21     |                 | 55:45  | 21 vs. 0  |
| rs642954   | SEC63     | Encode | 6   | 5      |                 | NA     | NA        |
| rs17072102 | SERPINB10 | Encode | 18  | 23     |                 | 55:45  | 3 vs. 11  |
| rs724558   | SERPINB10 | Encode | 18  | 23     |                 | 70:30  | 0 vs. 23  |
| rs8097425  | SERPINB10 | Encode | 18  | 24     |                 | 65:35  | 0 vs. 24  |
| rs963075   | SERPINB10 | Encode | 18  | 32     | High variance   | 60:40  | 11 vs. 15 |
| rs2288287  | SERPINB2  | Encode | 18  | 6      |                 | NA     | NA        |
| rs6098     | SERPINB2  | Encode | 18  | 12     |                 | 60:40  | 5 vs. 3   |
| rs6102     | SERPINB2  | Encode | 18  | 18     |                 | 50:50  | 3 vs. 1   |
| rs6104     | SERPINB2  | Cancer | 18  | 19     | High variance   | 65:35  | 2 vs. 15  |
| rs3169983  | SERPINB8  | Encode | 18  | 6      |                 | NA     | NA        |
| rs268687   | SERTAD1   | Encode | 19  | 37     |                 | 50:50  | 3 vs. 9   |
| rs523200   | SF1       | Encode | 11  | 18     |                 | 50:50  | 0 vs. 11  |
| rs10376    | SF3A1     | Encode | 22  | 32     |                 | 50:50  | 0 vs. 7   |
| rs2006771  | SFI1      | Encode | 22  | 40     |                 | 50:50  | 0 vs. 20  |
| rs5753700  | SFI1      | Encode | 22  | 6      |                 | NA     | NA        |
| rs1522     | SH3BGR    | Encode | 21  | 5      |                 | NA     | NA        |
| rs8190     | SIAH1     | Cancer | 16  | 12     |                 | 50:50  | 5 vs. 5   |



| rs         | Gene     | Panel  | chr | # Hets | Variance & Mean | meanAI | A vs. B   |
|------------|----------|--------|-----|--------|-----------------|--------|-----------|
| rs2258772  | SIN3B    | Cancer | 19  | 49     |                 | 50:50  | 5 vs. 15  |
| rs3184577  | SIN3B    | Cancer | 19  | 10     |                 | 50:50  | 1 vs. 6   |
| rs3772172  | SKIL     | Cancer | 3   | 32     |                 | 50:50  | 2 vs. 6   |
| rs1051266  | SLC19A1  | Encode | 21  | 41     |                 | 50:50  | 10 vs. 4  |
| rs1051298  | SLC19A1  | Encode | 21  | 42     |                 | 50:50  | 0 vs. 28  |
| rs419291   | SLC22A4  | Encode | 5   | 30     |                 | 55:45  | 7 vs. 8   |
| rs671473   | SLC22A5  | Encode | 5   | 25     |                 | 55:45  | 0 vs. 10  |
| rs11806    | SLC25A17 | Encode | 22  | 35     |                 | 55:45  | 20 vs. 4  |
| rs11173459 | SLC2A13  | Encode | 12  | 15     |                 | NA     | NA        |
| rs17178345 | SLC37A1  | Encode | 21  | 19     |                 | 55:45  | 0 vs. 16  |
| rs2839550  | SLC37A1  | Encode | 21  | 14     |                 | NA     | NA        |
| rs1042173  | SLC6A4   | Encode | 17  | 44     |                 | 50:50  | 25 vs. 1  |
| rs7420     | SLC9A3R1 | Encode | 17  | 44     |                 | 50:50  | 10 vs. 4  |
| rs2290725  | SMARCA3  | Cancer | 3   | 31     |                 | 50:50  | 5 vs. 14  |
| rs3182285  | SMARCA3  | Cancer | 3   | 31     |                 | 50:50  | 6 vs. 11  |
| rs7935     | SMARCA4  | Cancer | 19  | 21     |                 | 50:50  | 0 vs. 5   |
| rs11090285 | SMARCB1  | Cancer | 22  | 16     |                 | 50:50  | 0 vs. 3   |
| rs5030612  | SMARCB1  | Cancer | 22  | 15     |                 | NA     | NA        |
| rs5030612  | SMARCB1  | Encode | 22  | 14     |                 | 50:50  | 1 vs. 2   |
| rs6007010  | SMC1L2   | Encode | 22  | 13     |                 | NA     | NA        |
| rs1061280  | SMO      | Cancer | 7   | 23     |                 | 55:45  | 5 vs. 7   |
| rs1061285  | SMO      | Cancer | 7   | 23     |                 | 50:50  | 1 vs. 1   |
| rs3824     | SMO      | Cancer | 7   | 7      |                 | NA     | NA        |
| rs5997872  | SMTN     | Encode | 22  | 17     |                 | 50:50  | 1 vs. 4   |
| rs705      | SNRPN    | Cancer | 15  | 42     | High variance   | 95:05  | 18 vs. 24 |
| rs1308137  | SNX27    | Encode | 1   | 37     |                 | 50:50  | 2 vs. 3   |
| rs1054204  | SPARC    | Cancer | 5   | 36     |                 | 50:50  | 4 vs. 11  |
| rs1059279  | SPARC    | Cancer | 5   | 15     |                 | 55:45  | 1 vs. 8   |
| rs1059829  | SPARC    | Cancer | 5   | 34     |                 | 50:50  | 7 vs. 8   |
| rs1057233  | SPI1     | Cancer | 11  | 41     |                 | 50:50  | 12 vs. 6  |
| rs1053004  | STAT3    | Cancer | 17  | 30     |                 | 50:50  | 1 vs. 14  |
| rs1053023  | STAT3    | Cancer | 17  | 32     |                 | 50:50  | 0 vs. 7   |
| rs3744483  | STAT3    | Cancer | 17  | 32     |                 | 50:50  | 0 vs. 14  |
| rs3198502  | STAT5A   | Cancer | 17  | 32     |                 | 50:50  | 2 vs. 1   |
| rs2822640  | STCH     | Encode | 21  | 27     |                 | 50:50  | 7 vs. 5   |
| rs13309883 | STEAP2   | Encode | 7   | 36     |                 | 55:45  | 6 vs. 11  |
| rs194520   | STEAP2   | Encode | 7   | 17     |                 | 55:45  | 2 vs. 9   |
| rs194524   | STEAP2   | Encode | 7   | 21     |                 | 55:45  | 7 vs. 3   |
| rs414781   | SUHW2    | Encode | 22  | 16     |                 | NA     | NA        |
| rs2329902  | SUMO3    | Encode | 21  | 25     |                 | NA     | NA        |
| rs235292   | SUMO3    | Encode | 21  | 9      |                 | NA     | NA        |
| rs1049164  | SYK      | Cancer | 9   | 31     |                 | 55:45  | 9 vs. 8   |
| rs2290887  | SYK      | Cancer | 9   | 14     |                 | NA     | NA        |
| rs2290890  | SYK      | Cancer | 9   | 14     |                 | NA     | NA        |
| rs13554    | SYNJ1    | Encode | 21  | 30     |                 | 50:50  | 0 vs. 8   |
| rs2254562  | SYNJ1    | Encode | 21  | 17     |                 | 55:45  | 0 vs. 14  |
| rs844985   | SYNJ1    | Encode | 21  | 11     |                 | NA     | NA        |
| rs4823086  | TBC1D10A | Encode | 22  | 12     |                 | 55:45  | 1 vs. 3   |
| rs15411    | TBC1D22A | Encode | 22  | 31     |                 | 55:45  | 0 vs. 31  |
| rs2070116  | TCF20    | Encode | 22  | 33     |                 | 50:50  | 0 vs. 7   |
| rs9611746  | TCF20    | Encode | 22  | 35     |                 | 50:50  | 11 vs. 0  |

| rs         | Gene      | Panel  | chr | # Hets | Variance & Mean | meanAI | A vs. B   |
|------------|-----------|--------|-----|--------|-----------------|--------|-----------|
| rs6567211  | TCF4      | Cancer | 18  | 38     |                 | 50:50  | 0 vs. 21  |
| rs8766     | TCF4      | Cancer | 18  | 38     |                 | 50:50  | 0 vs. 19  |
| rs10418    | TCN2      | Encode | 22  | 26     |                 | 55:45  | 12 vs. 10 |
| rs1801198  | TCN2      | Encode | 22  | 33     |                 | 55:45  | 6 vs. 6   |
| rs9621049  | TCN2      | Encode | 22  | 6      |                 | NA     | NA        |
| rs6517105  | TCP10L    | Encode | 21  | 11     |                 | NA     | NA        |
| rs4135113  | TDG       | Cancer | 12  | 16     |                 | NA     | NA        |
| rs3189859  | TDGF1     | Cancer | 3   | 7      |                 | NA     | NA        |
| rs938886   | TEP1      | Cancer | 14  | 27     |                 | 55:45  | 0 vs. 24  |
| rs4428611  | TES       | Encode | 7   | 22     |                 | NA     | NA        |
| rs4710     | TES       | Encode | 7   | 37     |                 | 55:45  | 0 vs. 37  |
| rs4710     | TES       | Cancer | 7   | 43     |                 | 50:50  | 0 vs. 26  |
| rs9429072  | TESK2     | Cancer | 1   | 37     |                 | 50:50  | 4 vs. 12  |
| rs2073157  | TFEB      | Encode | 6   | 36     |                 | 50:50  | 5 vs. 5   |
| rs2273068  | TFEB      | Encode | 6   | 18     |                 | 50:50  | 1 vs. 0   |
| rs225334   | TFF2      | Encode | 21  | 17     |                 | 65:35  | 8 vs. 4   |
| rs7297     | TFG       | Cancer | 3   | 48     |                 | 50:50  | 22 vs. 3  |
| rs2032574  | TFIP11    | Encode | 22  | 15     |                 | 50:50  | 7 vs. 1   |
| rs17788379 | TFRC      | Cancer | 3   | 9      |                 | NA     | NA        |
| rs406271   | TFRC      | Cancer | 3   | 33     |                 | 60:40  | 29 vs. 0  |
| rs868      | TGFBR1    | Cancer | 9   | 33     |                 | 50:50  | 4 vs. 5   |
| rs902      | TGFBR3    | Cancer | 1   | 31     |                 | 50:50  | 6 vs. 7   |
| rs2292305  | THBS1     | Cancer | 15  | 13     | Mean shifted    | NA     | NA        |
| rs17062695 | TJP2      | Cancer | 9   | 20     |                 | 55:45  | 0 vs. 14  |
| rs3812536  | TJP2      | Cancer | 9   | 38     |                 | 50:50  | 0 vs. 21  |
| rs1065769  | TK1       | Cancer | 17  | 29     |                 | 50:50  | 2 vs. 3   |
| rs10771314 | TM7SF3    | Cancer | 12  | 24     |                 | NA     | NA        |
| rs4856     | TM7SF3    | Cancer | 12  | 24     |                 | NA     | NA        |
| rs2838475  | TMEM1     | Encode | 21  | 13     |                 | 50:50  | 0 vs. 7   |
| rs1532     | TMEM50B   | Encode | 21  | 21     |                 | 55:45  | 0 vs. 15  |
| rs2834216  | TMEM50B   | Encode | 21  | 21     |                 | 50:50  | 6 vs. 1   |
| rs3743887  | TMEM8     | Encode | 16  | 5      |                 | NA     | NA        |
| rs2839500  | TMPRSS3   | Encode | 21  | 13     | High variance   | NA     | NA        |
| rs4820268  | TMPRSS6   | Encode | 22  | 38     |                 | 60:40  | 25 vs. 1  |
| rs3093665  | TNF       | Cancer | 6   | 7      |                 | NA     | NA        |
| rs3093704  | TNFAIP1   | Cancer | 17  | 10     |                 | NA     | NA        |
| rs1047275  | TNFRSF10B | Cancer | 8   | 44     |                 | 55:45  | 0 vs. 41  |
| rs11135695 | TNFRSF10B | Cancer | 8   | 37     |                 | 60:40  | 0 vs. 32  |
| rs7957     | TNFRSF10D | Cancer | 8   | 24     |                 | 50:50  | 0 vs. 0   |
| rs7290134  | TNFRSF13C | Encode | 22  | 27     |                 | 50:50  | 1 vs. 9   |
| rs1061622  | TNFRSF1B  | Cancer | 1   | 26     |                 | 50:50  | 2 vs. 6   |
| rs1061624  | TNFRSF1B  | Cancer | 1   | 45     |                 | 55:45  | 3 vs. 27  |
| rs1061628  | TNFRSF1B  | Cancer | 1   | 35     |                 | 50:50  | 5 vs. 14  |
| rs1131532  | TNFSF10   | Cancer | 3   | 30     |                 | 50:50  | 0 vs. 10  |
| rs1131535  | TNFSF10   | Cancer | 3   | 40     |                 | 50:50  | 2 vs. 18  |
| rs1131542  | TNFSF10   | Cancer | 3   | 30     |                 | 50:50  | 9 vs. 6   |
| rs12485008 | TNRC6B    | Encode | 22  | 5      |                 | NA     | NA        |
| rs6001734  | TNRC6B    | Encode | 22  | 32     |                 | 50:50  | 2 vs. 11  |
| rs4626     | TOB1      | Cancer | 17  | 28     |                 | 50:50  | 5 vs. 11  |
| rs202641   | TOB2      | Encode | 22  | 29     |                 | NA     | NA        |
| rs5750668  | TOMM22    | Encode | 22  | 25     |                 | 50:50  | 2 vs. 0   |

| rs         | Gene    | Panel  | chr | # Hets | Variance & Mean | meanAI | A vs. B   |
|------------|---------|--------|-----|--------|-----------------|--------|-----------|
| rs13695    | TOP2A   | Cancer | 17  | 29     |                 | 50:50  | 0 vs. 16  |
| rs1058298  | TP53BP1 | Encode | 15  | 41     |                 | 50:50  | 4 vs. 14  |
| rs2602141  | TP53BP1 | Encode | 15  | 40     |                 | 50:50  | 1 vs. 11  |
| rs689647   | TP53BP1 | Encode | 15  | 8      |                 | NA     | NA        |
| rs690367   | TP53BP1 | Encode | 15  | 40     |                 | 55:45  | 0 vs. 38  |
| rs2181484  | TP73    | Encode | 1   | 15     |                 | NA     | NA        |
| rs3753565  | TPR     | Cancer | 1   | 23     |                 | 50:50  | 1 vs. 10  |
| rs1131877  | TRAF3   | Cancer | 14  | 27     |                 | 50:50  | 4 vs. 5   |
| rs10769167 | TRIM5   | Encode | 11  | 15     |                 | 50:50  | 2 vs. 1   |
| rs3740995  | TRIM5   | Encode | 11  | 18     |                 | 50:50  | 5 vs. 1   |
| rs3740996  | TRIM5   | Encode | 11  | 11     |                 | 50:50  | 2 vs. 3   |
| rs7120209  | TRIM6   | Encode | 11  | 13     |                 | 60:40  | 7 vs. 4   |
| rs7927012  | TRIM6   | Encode | 11  | 30     |                 | 65:35  | 10 vs. 12 |
| rs6706     | TRIP6   | Cancer | 7   | 12     |                 | 55:45  | 11 vs. 0  |
| rs13585    | TRMU    | Encode | 22  | 21     |                 | 50:50  | 3 vs. 2   |
| rs1051771  | TSC2    | Cancer | 16  | 13     |                 | 50:50  | 0 vs. 10  |
| rs635608   | TSEN34  | Encode | 19  | 15     |                 | 50:50  | 4 vs. 1   |
| rs2839531  | TSGA2   | Encode | 21  | 12     |                 | NA     | NA        |
| rs2839536  | TSGA2   | Encode | 21  | 19     |                 | 60:40  | 0 vs. 11  |
| rs1053808  | TTC3    | Encode | 21  | 43     |                 | 50:50  | 7 vs. 1   |
| rs1053966  | TTC3    | Encode | 21  | 42     |                 | 50:50  | 3 vs. 4   |
| rs2835574  | TTC3    | Encode | 21  | 38     |                 | 50:50  | 3 vs. 0   |
| rs2835665  | TTC3    | Encode | 21  | 26     |                 | 50:50  | 8 vs. 0   |
| rs9974286  | TTC3    | Encode | 21  | 38     |                 | 50:50  | 8 vs. 0   |
| rs2076155  | TTLL1   | Encode | 22  | 6      |                 | NA     | NA        |
| rs5759125  | TTLL1   | Encode | 22  | 12     |                 | NA     | NA        |
| rs12159975 | TUBA8   | Encode | 22  | 9      |                 | NA     | NA        |
| rs1053395  | TUBB4   | Cancer | 19  | 32     |                 | 60:40  | 2 vs. 21  |
| rs3099129  | TUBB4   | Cancer | 19  | 11     |                 | NA     | NA        |
| rs11703226 | TUBGCP6 | Encode | 22  | 28     |                 | NA     | NA        |
| rs1044732  | TXNRD2  | Encode | 22  | 12     |                 | 55:45  | 0 vs. 12  |
| rs5992495  | TXNRD2  | Encode | 22  | 19     |                 | 55:45  | 0 vs. 12  |
| rs2790     | TYMS    | Cancer | 18  | 12     |                 | 55:45  | 10 vs. 0  |
| rs699517   | TYMS    | Cancer | 18  | 27     |                 | 50:50  | 0 vs. 16  |
| rs6554     | UBA52   | Cancer | 19  | 50     |                 | 50:50  | 5 vs. 3   |
| rs220159   | UMODL1  | Encode | 21  | 23     |                 | 55:45  | 2 vs. 9   |
| rs7280633  | UMODL1  | Encode | 21  | 19     |                 | 60:40  | 0 vs. 14  |
| rs1043524  | UNC84B  | Encode | 22  | 26     |                 | 50:50  | 0 vs. 18  |
| rs2072797  | UNC84B  | Encode | 22  | 19     |                 | 55:45  | 0 vs. 18  |
| rs1314     | UPB1    | Encode | 22  | 21     |                 | 50:50  | 14 vs. 1  |
| rs1034123  | USP16   | Encode | 21  | 9      |                 | NA     | NA        |
| rs2274802  | USP16   | Encode | 21  | 37     |                 | 50:50  | 0 vs. 1   |
| rs3180408  | USP18   | Encode | 22  | 33     |                 | 55:45  | 3 vs. 8   |
| rs2185798  | USP49   | Encode | 6   | 41     |                 | 50:50  | 10 vs. 13 |
| rs1010     | VAMP8   | Cancer | 2   | 44     |                 | 50:50  | 8 vs. 2   |
| rs1058588  | VAMP8   | Cancer | 2   | 44     |                 | 50:50  | 0 vs. 33  |
| rs3731828  | VAMP8   | Cancer | 2   | 38     |                 | 50:50  | 0 vs. 17  |
| rs602990   | VAV2    | Cancer | 9   | 37     |                 | 55:45  | 21 vs. 3  |
| rs11887    | VBP1    | Cancer | X   | 12     | High variance   | 80:20  | 6 vs. 5   |
| rs2010963  | VEGF    | Cancer | 6   | 31     |                 | 50:50  | 9 vs. 0   |
| rs25648    | VEGF    | Cancer | 6   | 7      |                 | 50:50  | 0 vs. 1   |

| rs         | Gene   | Panel  | chr | # Hets | Variance & Mean | meanAI | A vs. B  |
|------------|--------|--------|-----|--------|-----------------|--------|----------|
| rs3025039  | VEGF   | Cancer | 6   | 14     |                 | 50:50  | 0 vs. 10 |
| rs7294     | VKORC1 | Encode | 16  | 36     |                 | 50:50  | 0 vs. 1  |
| rs2248490  | WDR4   | Encode | 21  | 46     |                 | 55:45  | 20 vs. 4 |
| rs3746939  | WDR4   | Encode | 21  | 17     |                 | 55:45  | 1 vs. 8  |
| rs6586250  | WDR4   | Encode | 21  | 25     |                 | 50:50  | 1 vs. 6  |
| rs9977828  | WDR4   | Encode | 21  | 12     |                 | NA     | NA       |
| rs1049403  | WEE1   | Cancer | 11  | 30     |                 | NA     | NA       |
| rs2024233  | WNT2   | Encode | 7   | 24     | High variance   | 65:35  | 7 vs. 9  |
| rs2024233  | WNT2   | Cancer | 7   | 15     | High variance   | 65:35  | 2 vs. 4  |
| rs1060180  | WRB    | Encode | 21  | 20     |                 | 50:50  | 12 vs. 3 |
| rs1346044  | WRN    | Cancer | 8   | 35     |                 | 50:50  | 1 vs. 6  |
| rs1800392  | WRN    | Cancer | 8   | 33     |                 | 50:50  | 0 vs. 15 |
| rs2228000  | XPC    | Cancer | 3   | 25     |                 | NA     | NA       |
| rs2229090  | XPC    | Cancer | 3   | 35     |                 | 50:50  | 0 vs. 11 |
| rs2470352  | XPC    | Cancer | 3   | 33     |                 | 50:50  | 2 vs. 1  |
| rs1799782  | XRCC1  | Cancer | 19  | 9      |                 | 60:40  | 0 vs. 9  |
| rs3547     | XRCC1  | Cancer | 19  | 43     |                 | 50:50  | 12 vs. 6 |
| rs3218536  | XRCC2  | Cancer | 7   | 8      |                 | 55:45  | 0 vs. 4  |
| rs1056503  | XRCC4  | Cancer | 5   | 14     |                 | NA     | NA       |
| rs2035990  | XRCC4  | Cancer | 5   | 11     |                 | NA     | NA       |
| rs1051677  | XRCC5  | Cancer | 2   | 12     |                 | NA     | NA       |
| rs1051685  | XRCC5  | Cancer | 2   | 15     |                 | NA     | NA       |
| rs207906   | XRCC5  | Cancer | 2   | 17     |                 | 55:45  | 0 vs. 17 |
| rs1060922  | YES1   | Cancer | 18  | 34     |                 | 55:45  | 24 vs. 0 |
| rs1061035  | YES1   | Cancer | 18  | 16     |                 | NA     | NA       |
| rs2278699  | ZAP70  | Cancer | 2   | 3      |                 | 75:25  | 1 vs. 0  |
| rs910796   | ZBED4  | Encode | 22  | 19     |                 | NA     | NA       |
| rs4822021  | ZC3H7B | Encode | 22  | 31     |                 | 55:45  | 19 vs. 0 |
| rs5751084  | ZC3H7B | Encode | 22  | 30     |                 | 55:45  | 0 vs. 23 |
| rs2070132  | ZNF146 | Cancer | 19  | 29     |                 | 50:50  | 4 vs. 7  |
| rs4806293  | ZNF146 | Cancer | 19  | 27     |                 | 55:45  | 0 vs. 18 |
| rs11041108 | ZNF215 | Cancer | 11  | 32     |                 | 55:45  | 9 vs. 7  |
| rs2239730  | ZNF215 | Cancer | 11  | 41     |                 | 60:40  | 17 vs. 6 |
| rs2239731  | ZNF215 | Cancer | 11  | 44     |                 | 60:40  | 6 vs. 17 |
| rs11088101 | ZNF294 | Encode | 21  | 20     |                 | 50:50  | 2 vs. 3  |
| rs2245431  | ZNF294 | Encode | 21  | 22     |                 | NA     | NA       |
| rs2254796  | ZNF294 | Encode | 21  | 39     |                 | 50:50  | 1 vs. 3  |
| rs11702690 | ZNF295 | Encode | 21  | 10     |                 | NA     | NA       |
| rs2298265  | ZNF687 | Encode | 1   | 21     |                 | 55:45  | 13 vs. 0 |
| rs9612413  | ZNF70  | Encode | 22  | 8      |                 | NA     | NA       |
| rs4020     | ZNF74  | Encode | 22  | 32     |                 | 50:50  | 14 vs. 1 |
| rs2241666  | ZWINT  | Cancer | 10  | 44     |                 | 50:50  | 5 vs. 1  |
